# Supplementary material for: Causal and Candidate Gene Variants in a Large Cohort of Women with Primary Ovarian Insufficiency
Source: bioRxiv or medRxiv preprint supplement (doi:10.1101/2021.06.02.21258048), 2021-06-04

Supplemental Figure 1

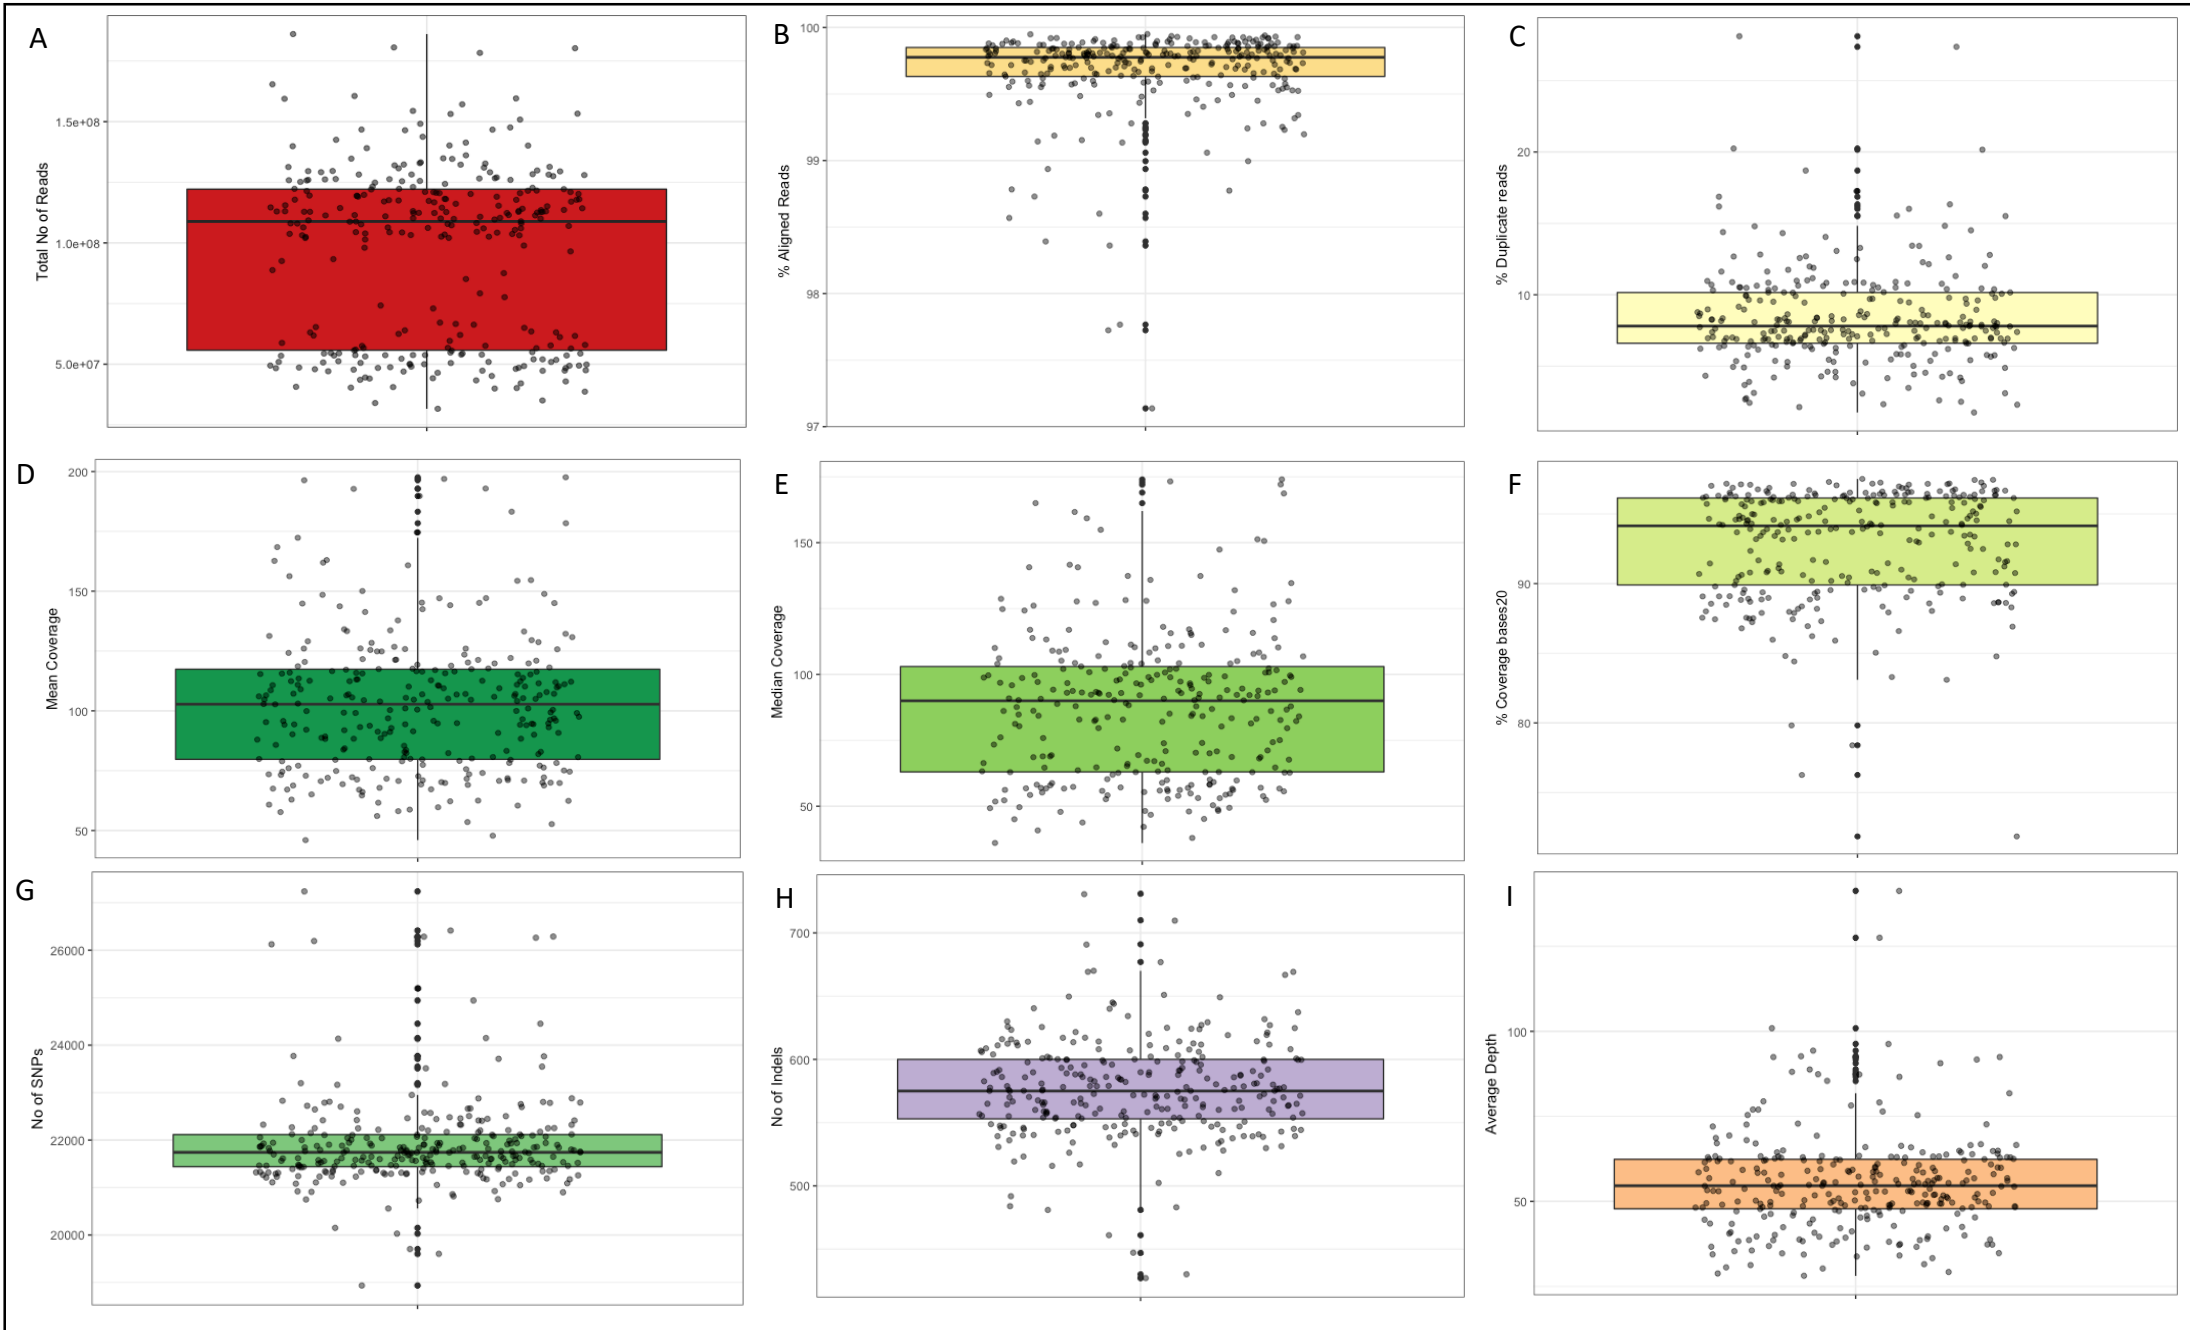

# Supplemental Figure 2

A

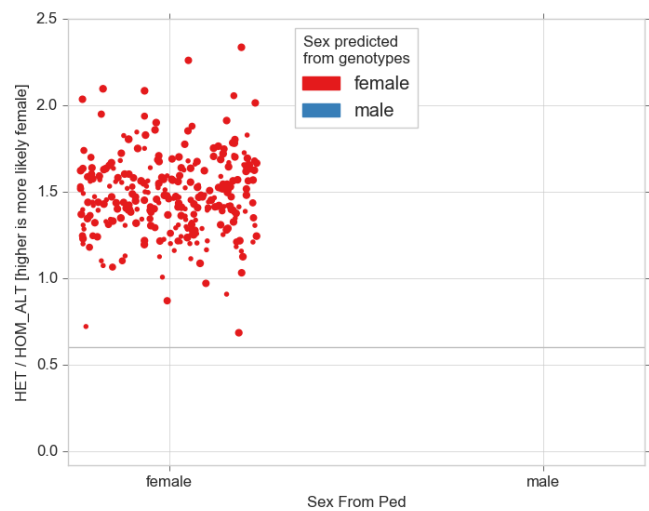

C

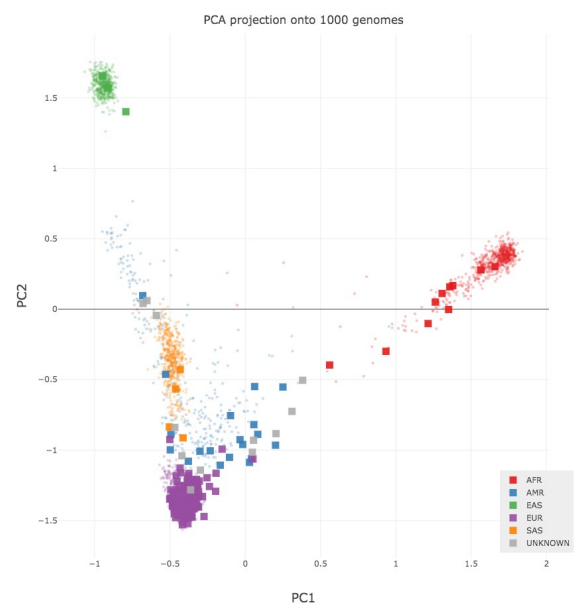

B

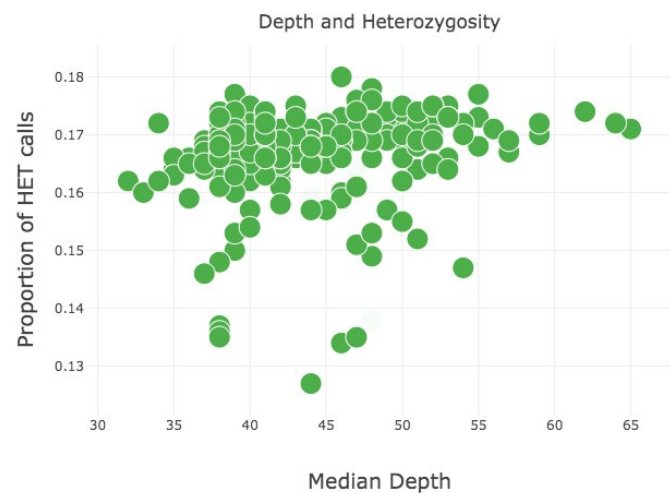

D

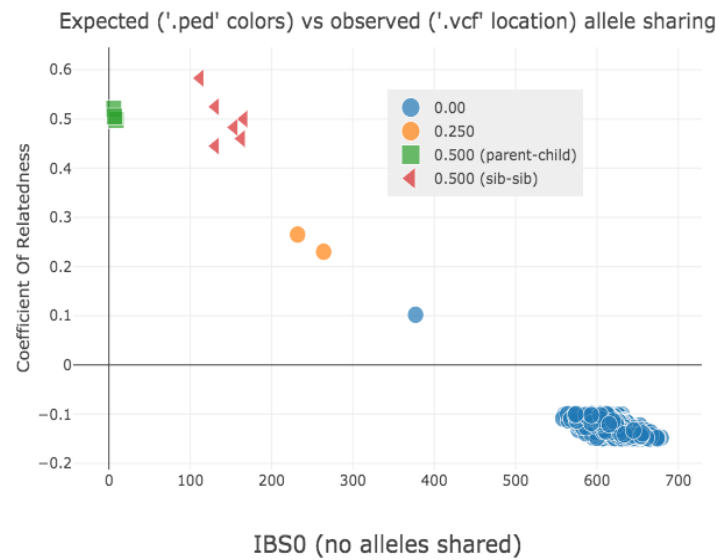

E

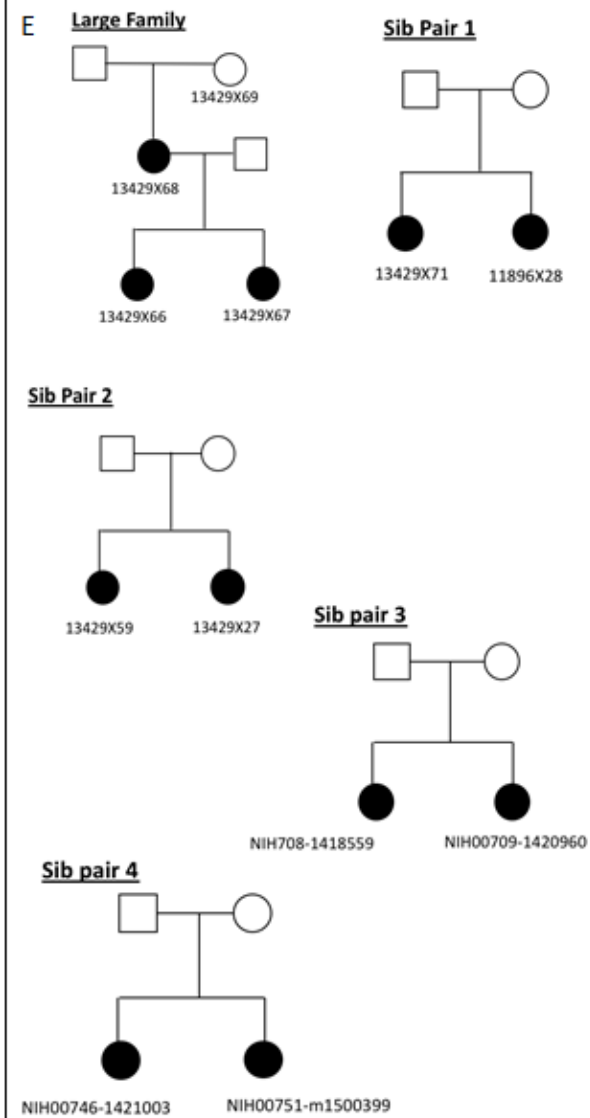

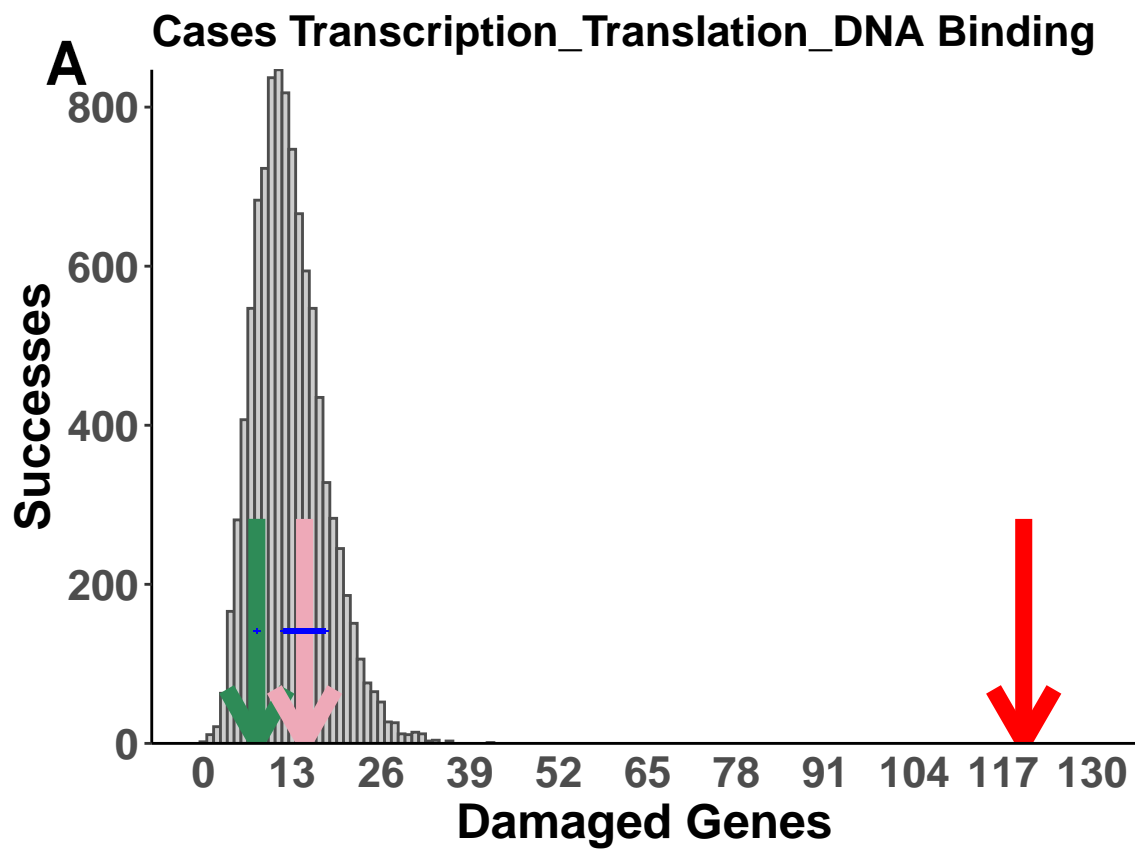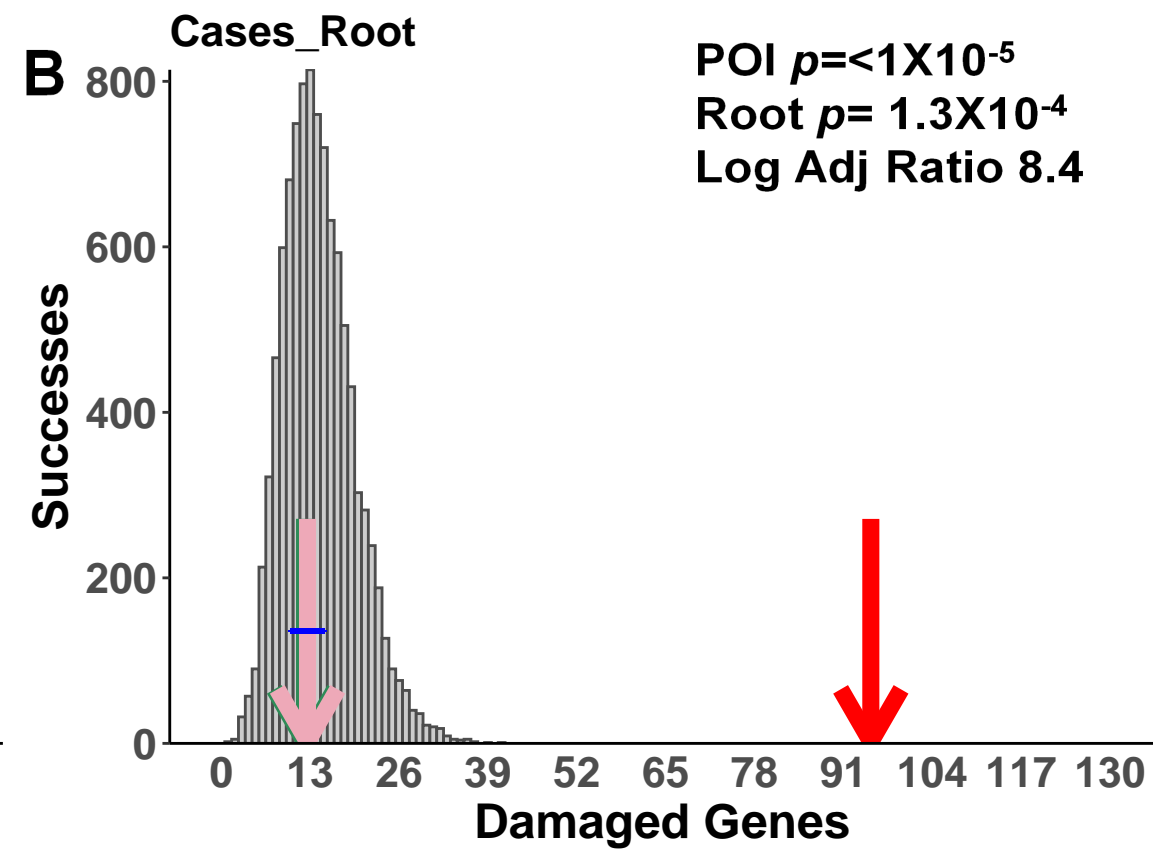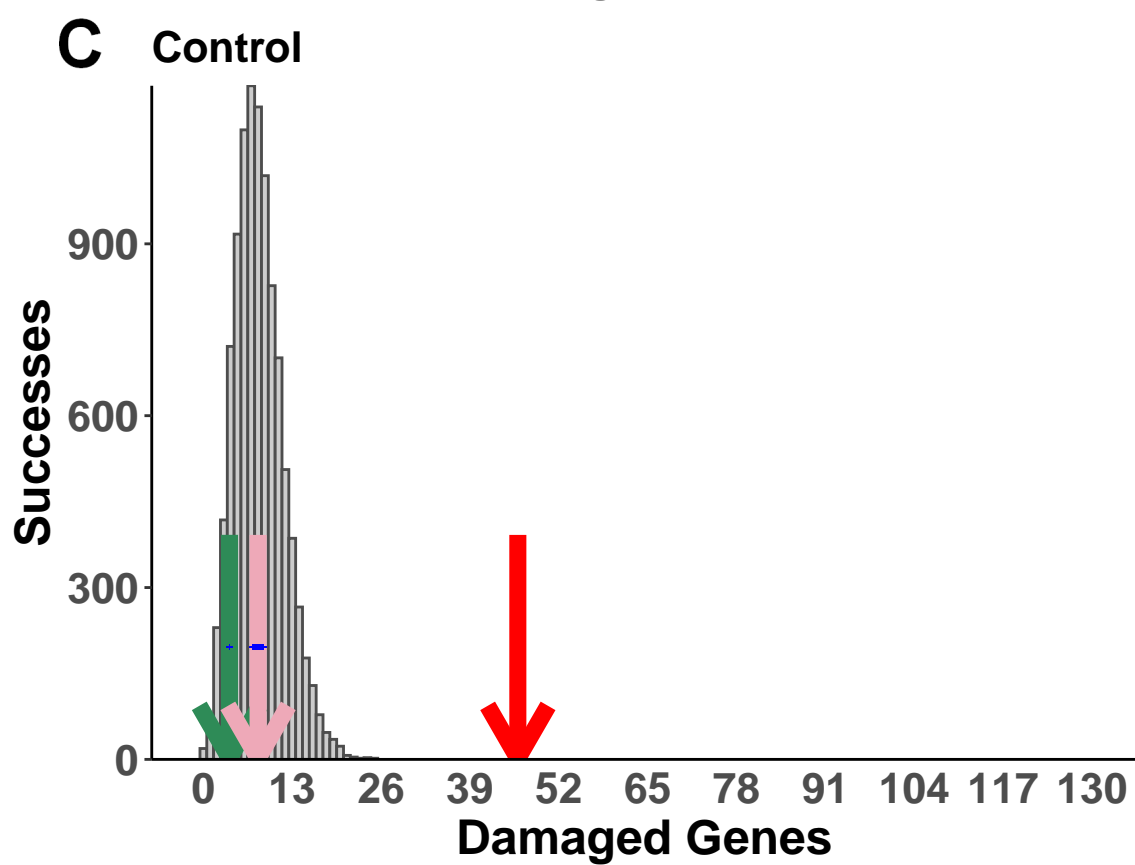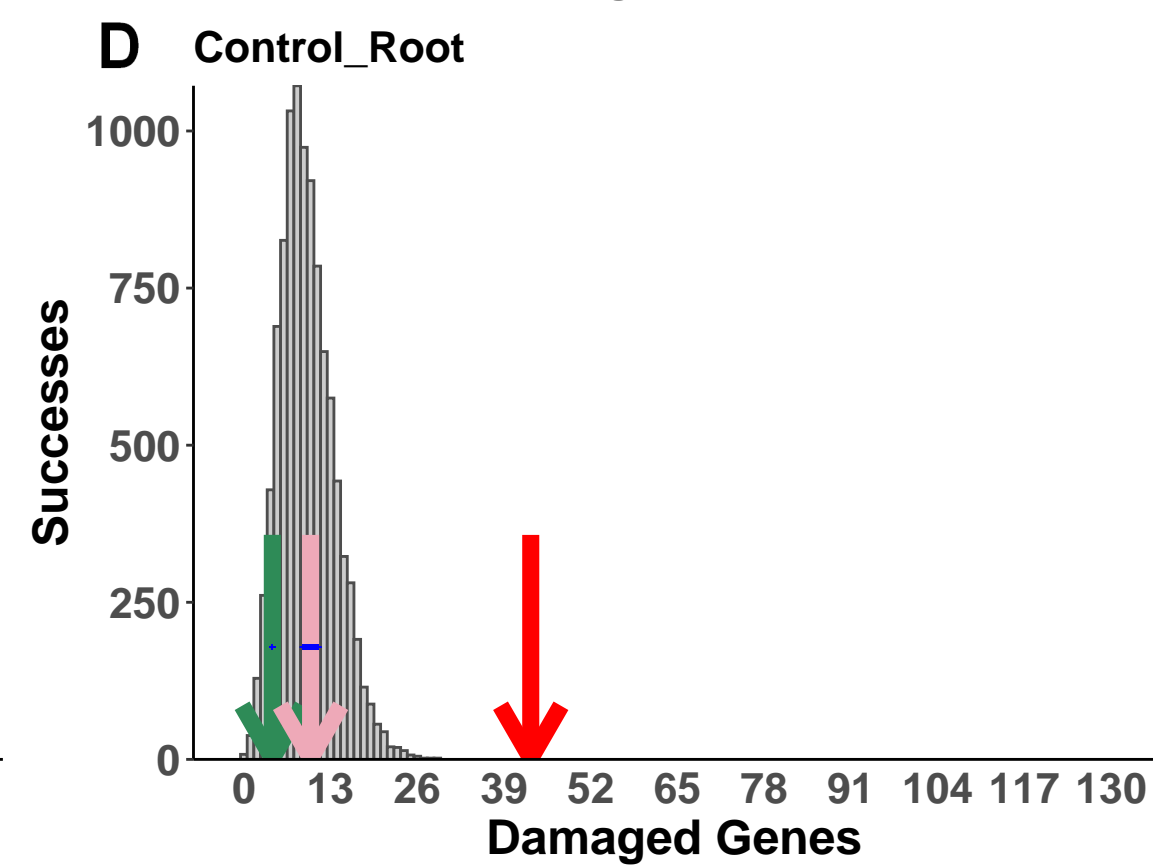

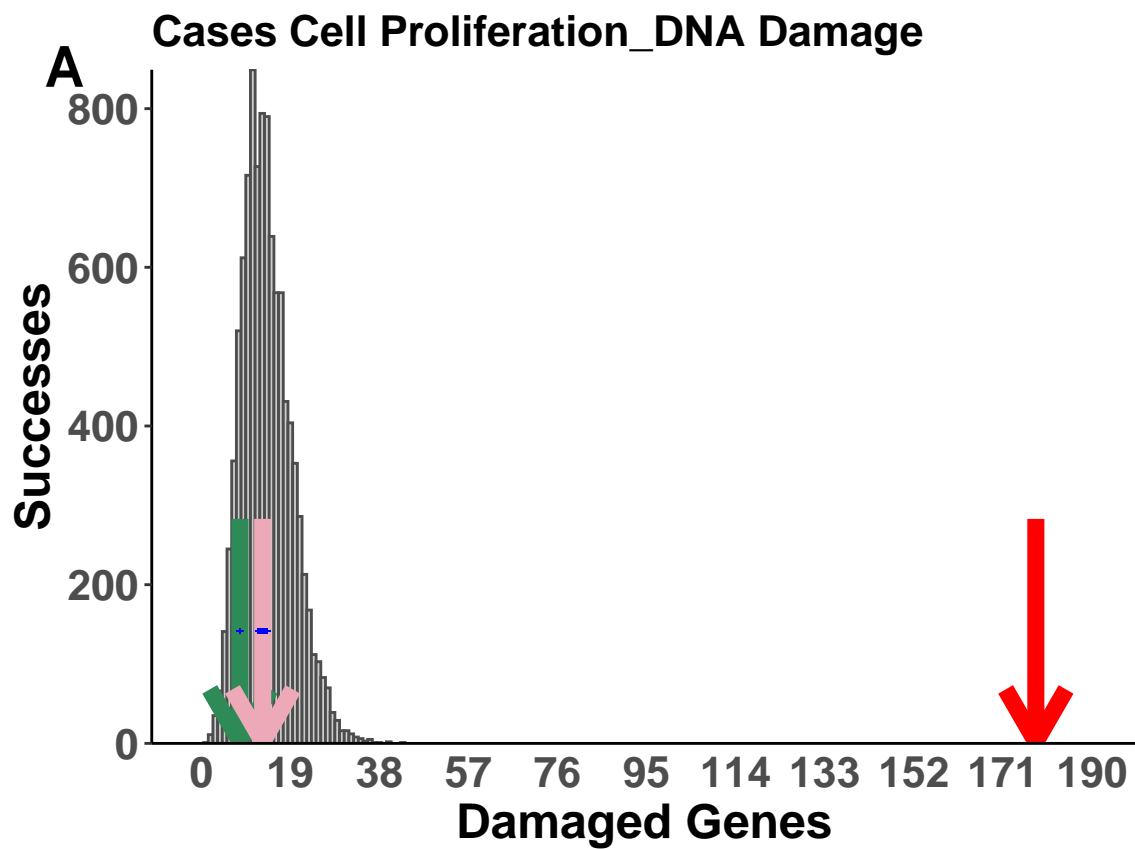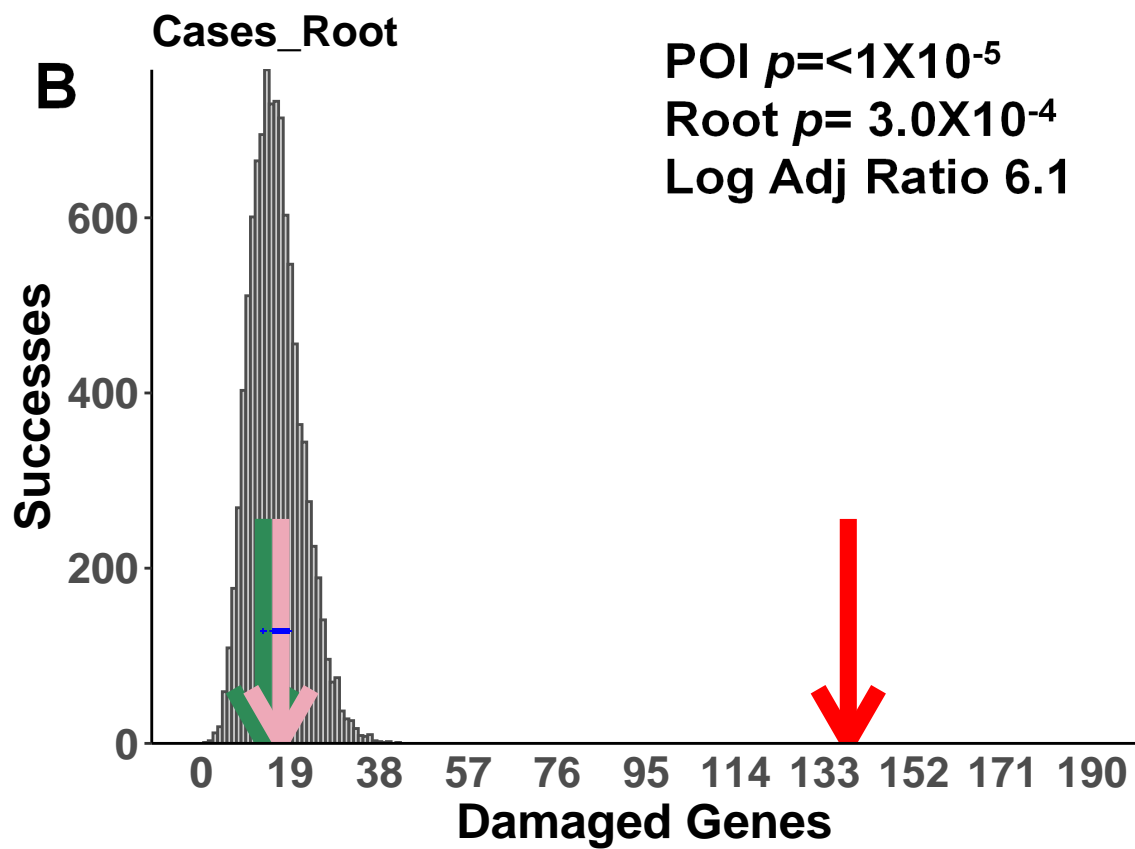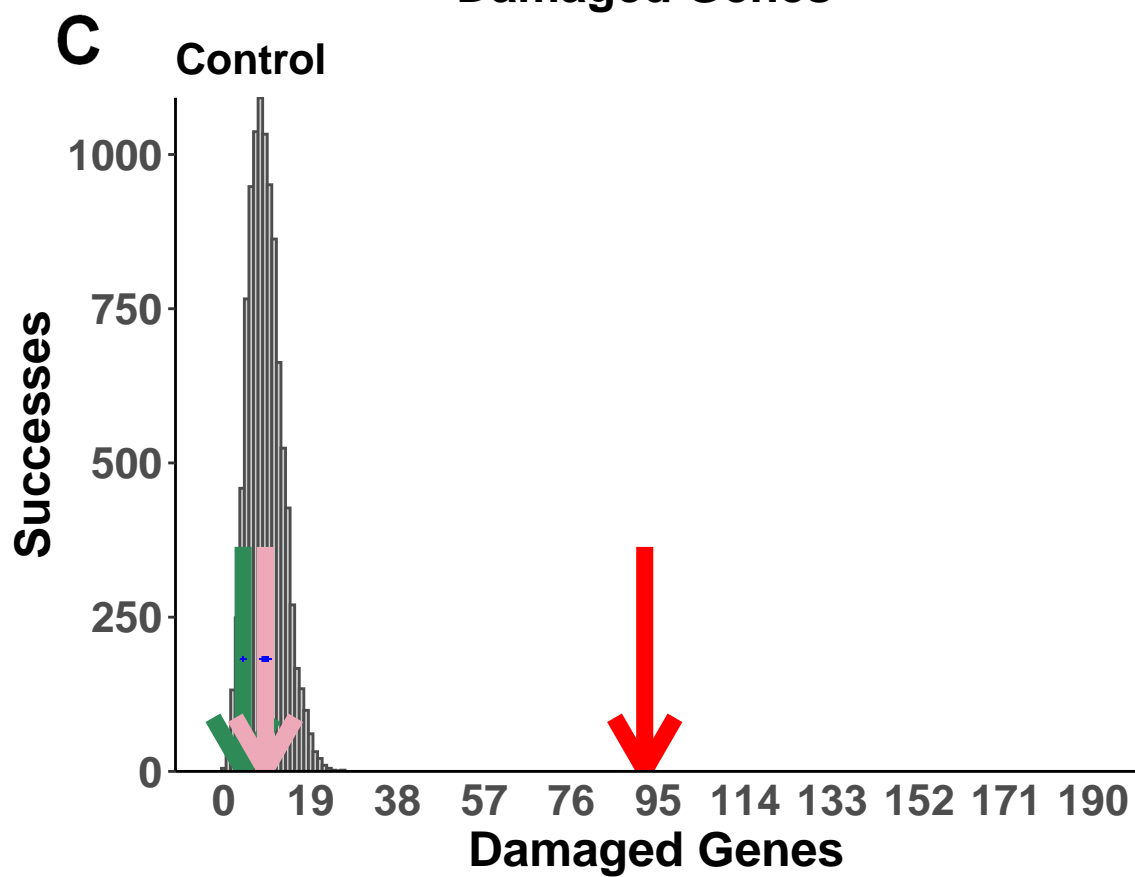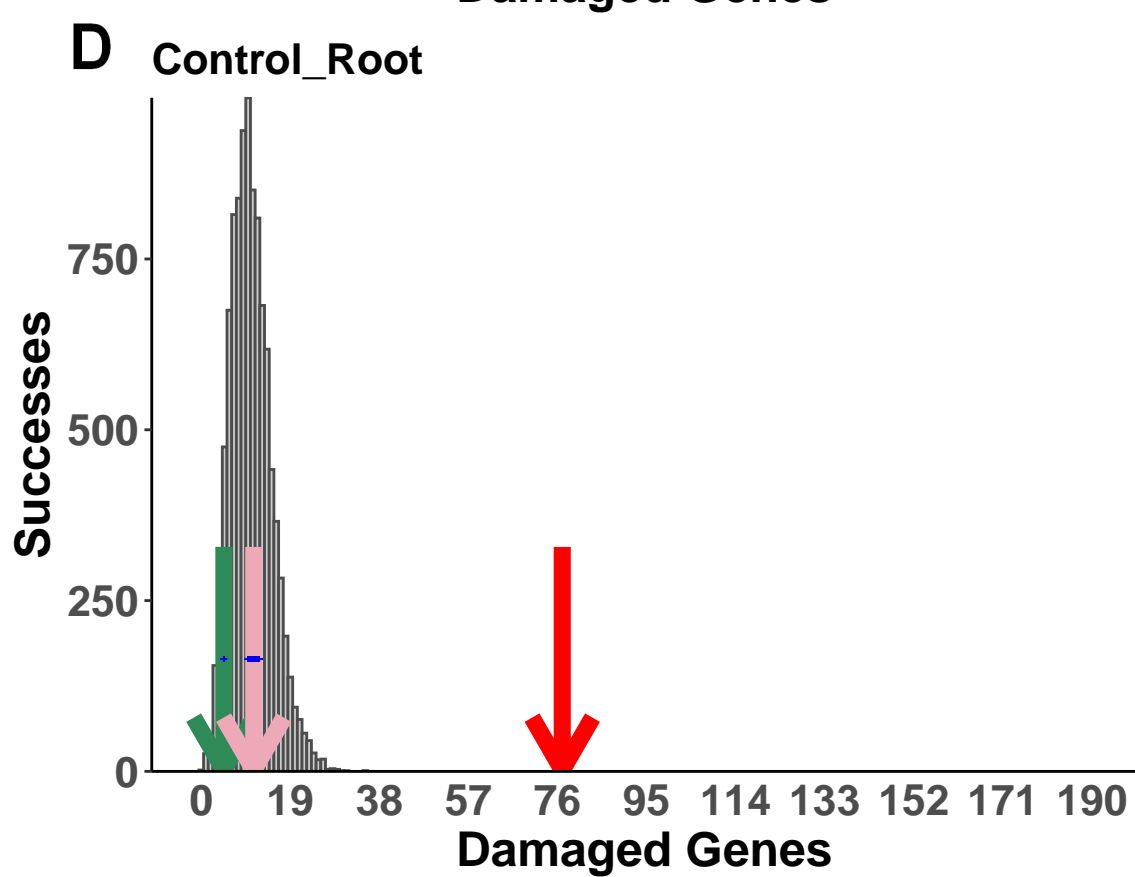

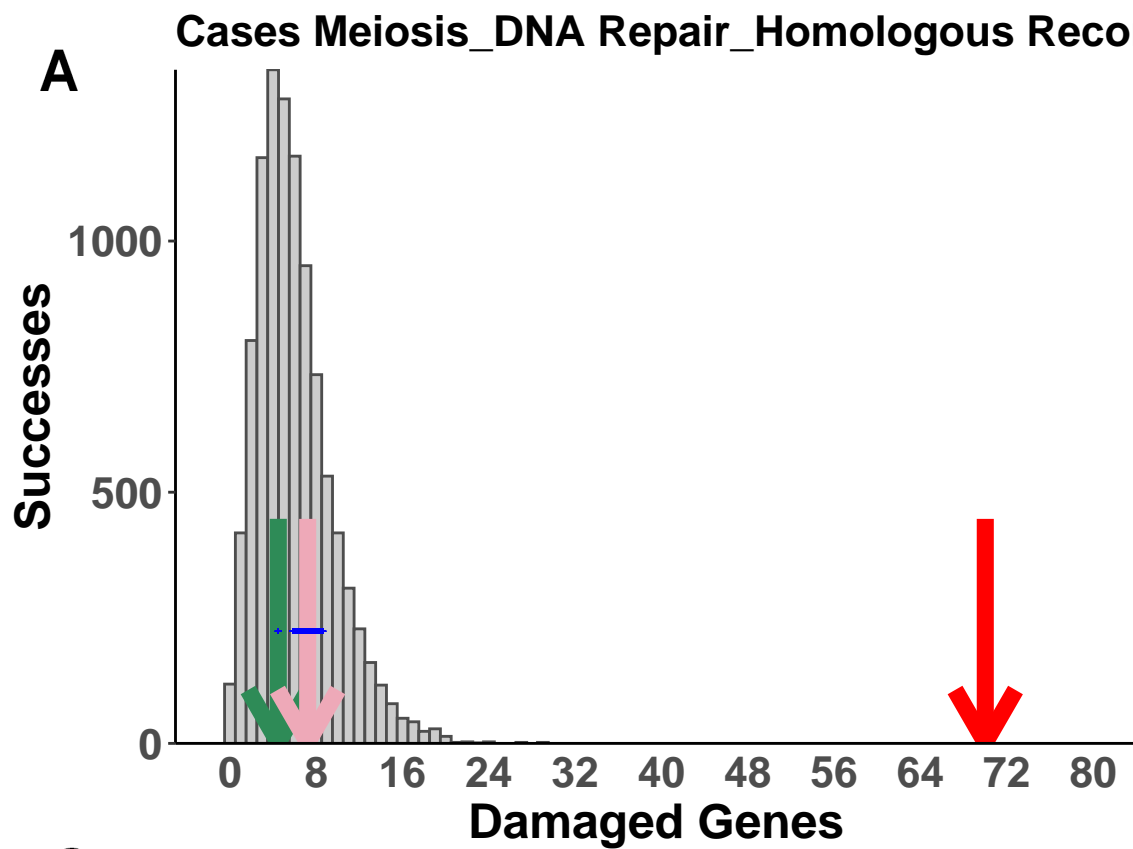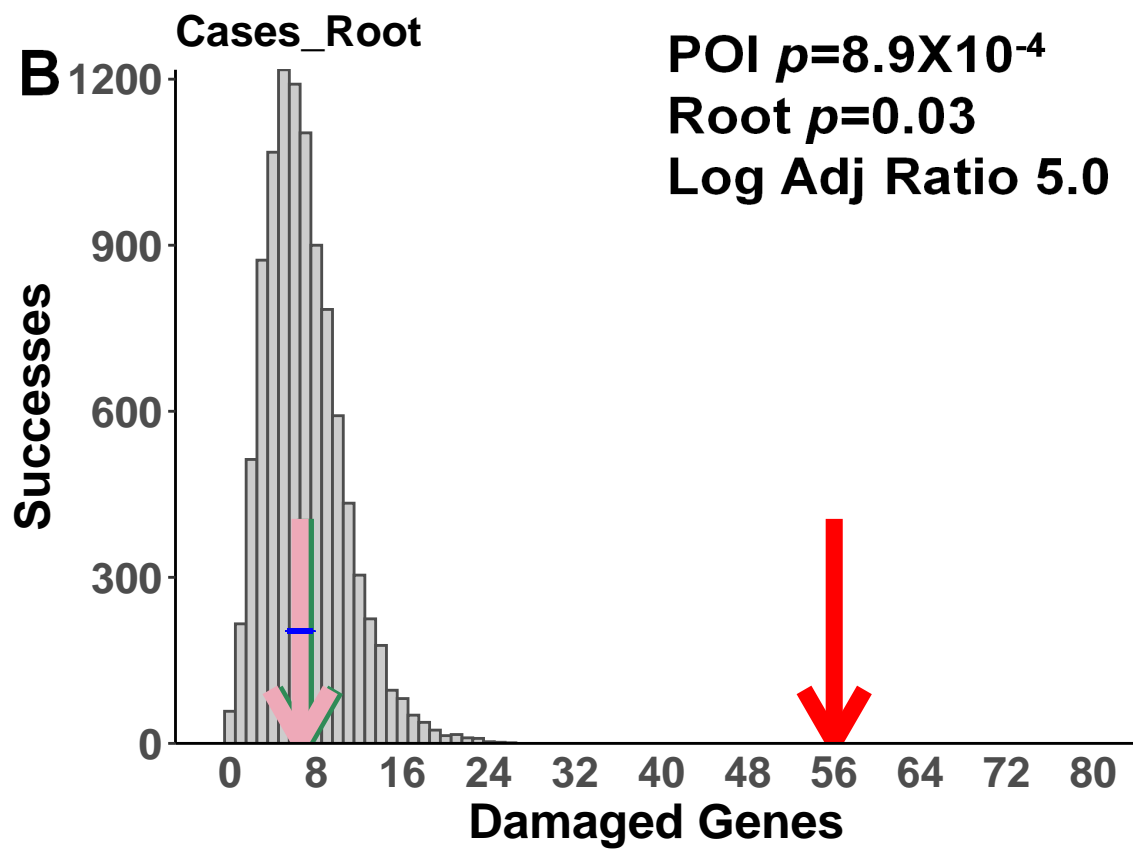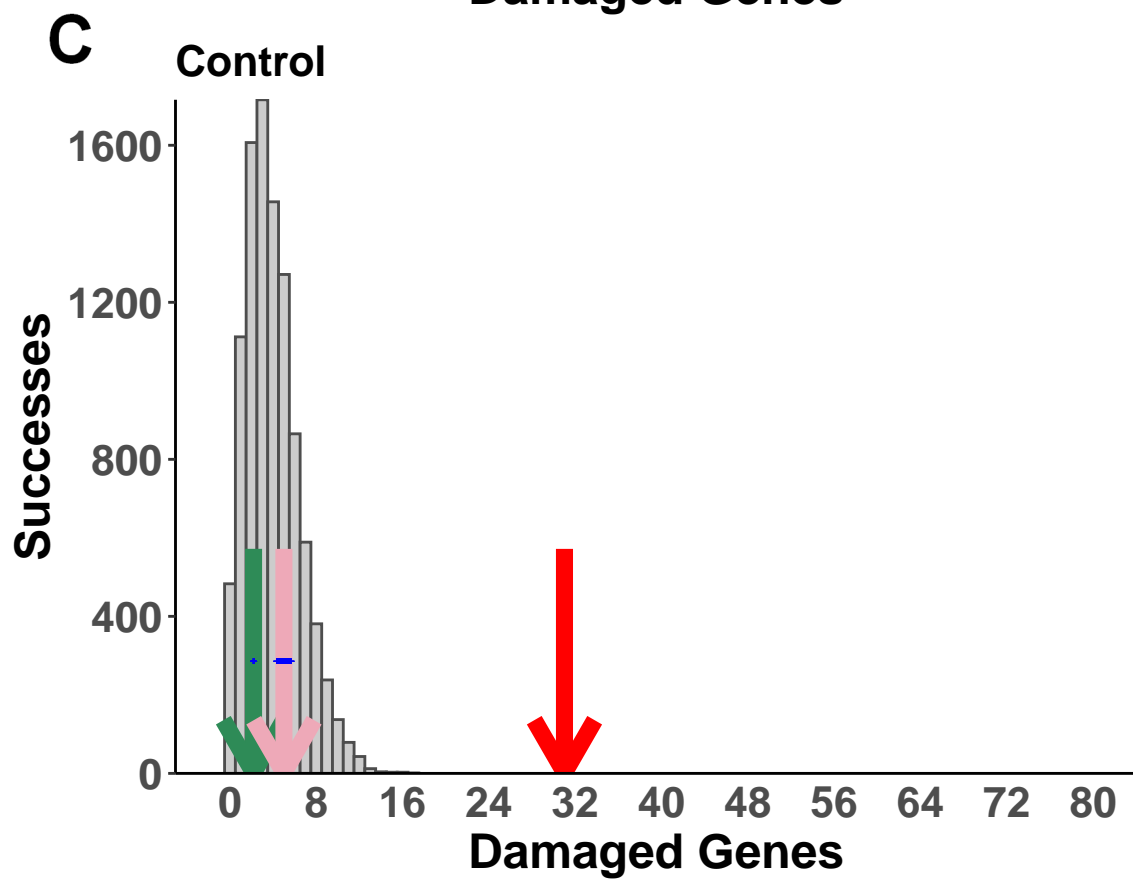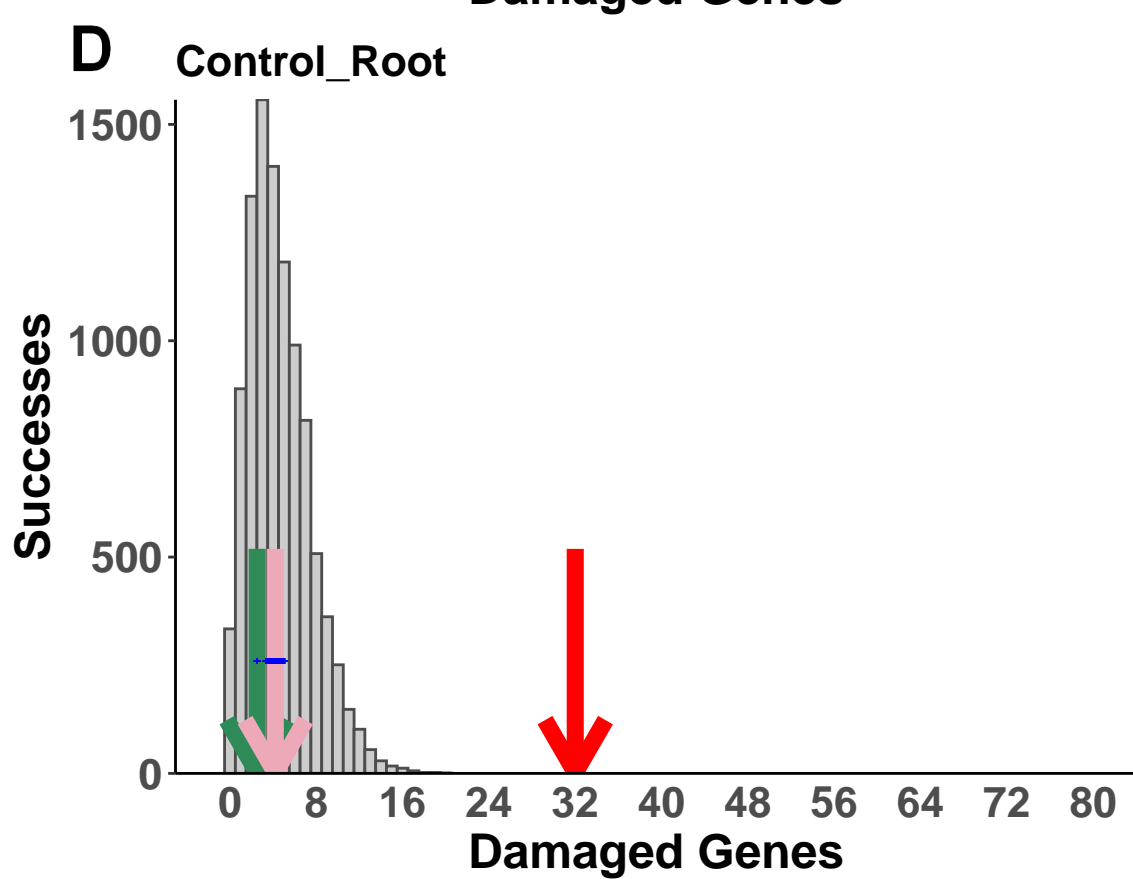

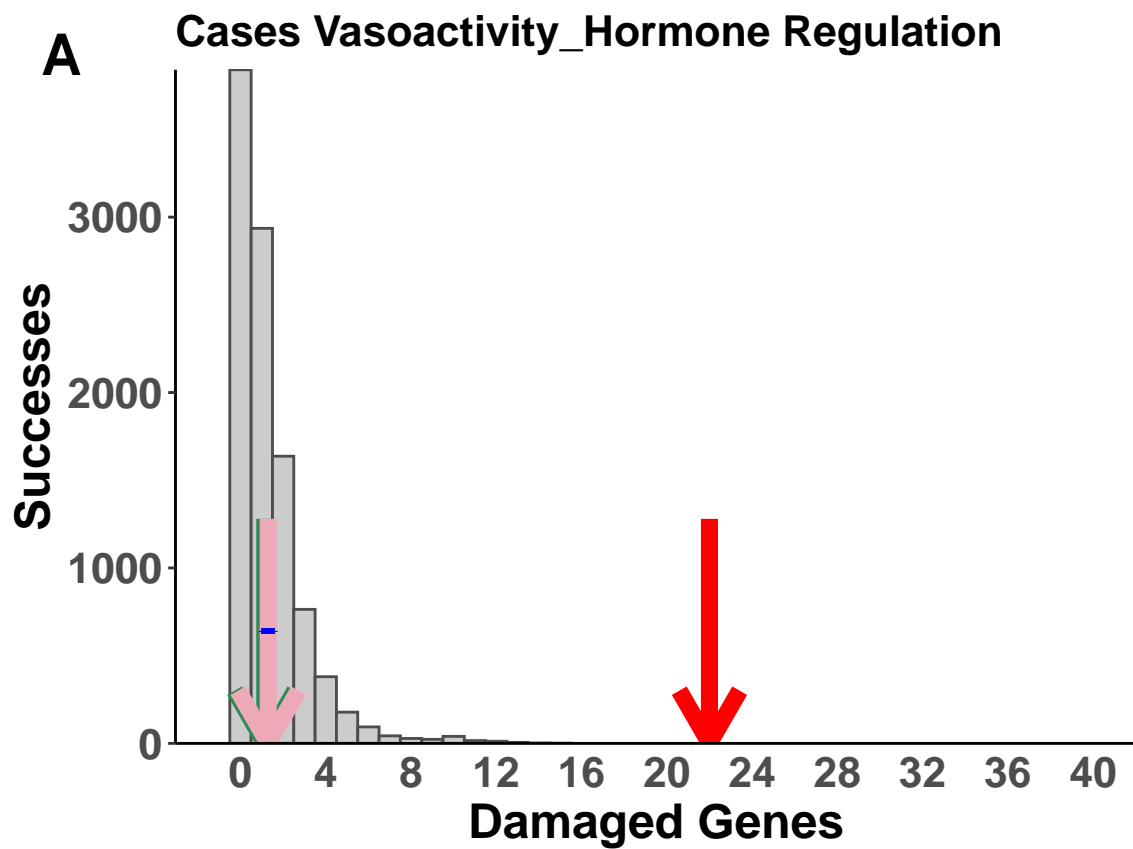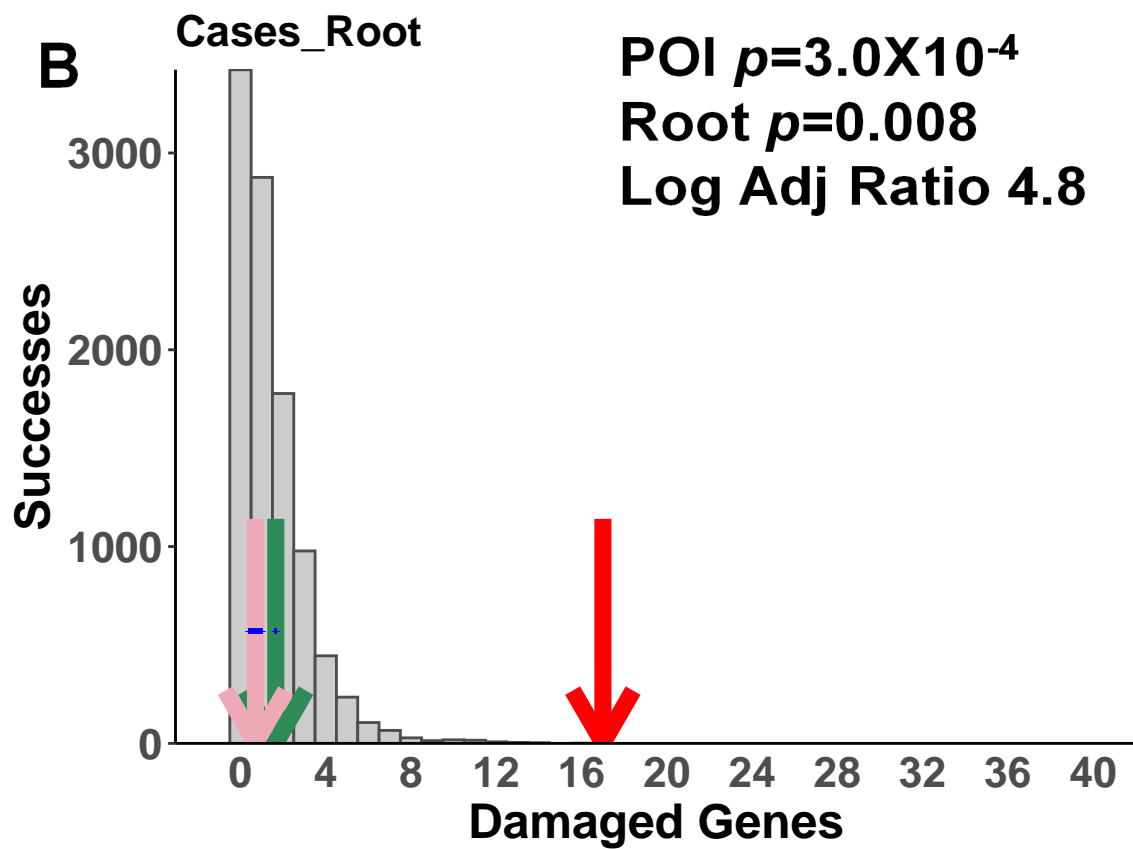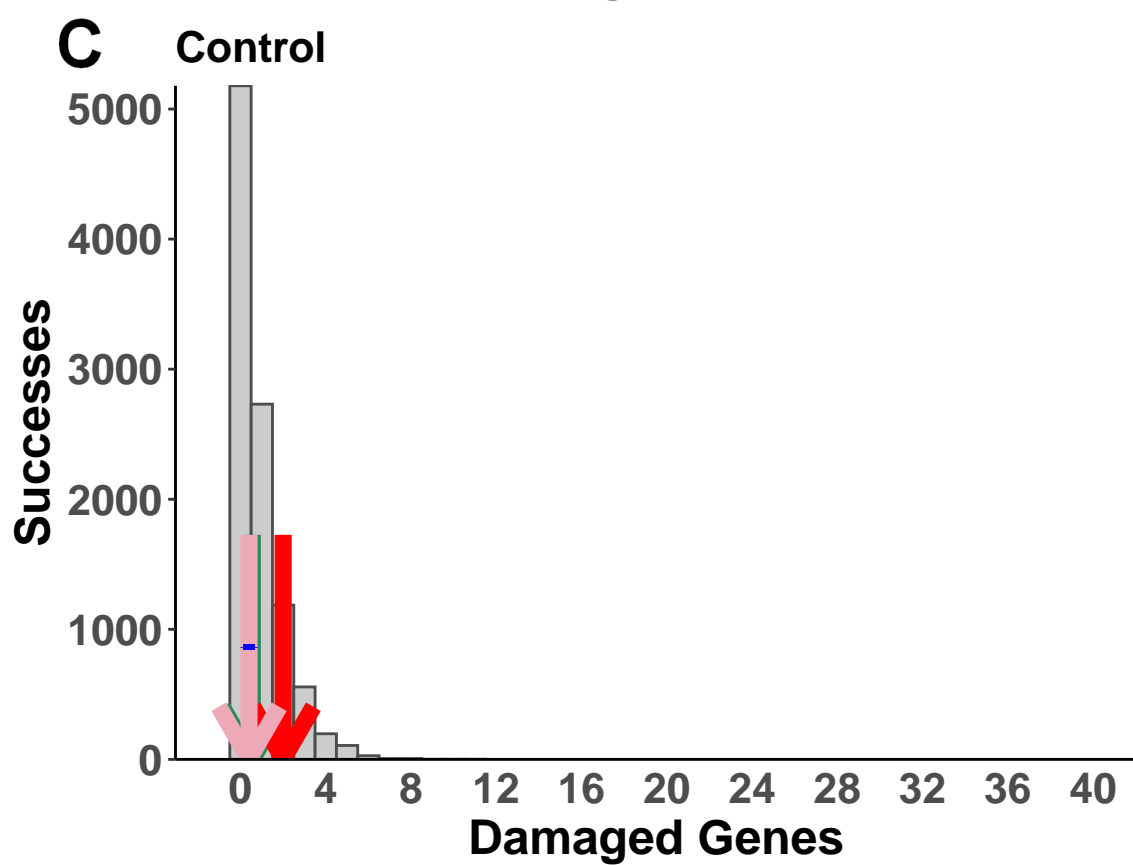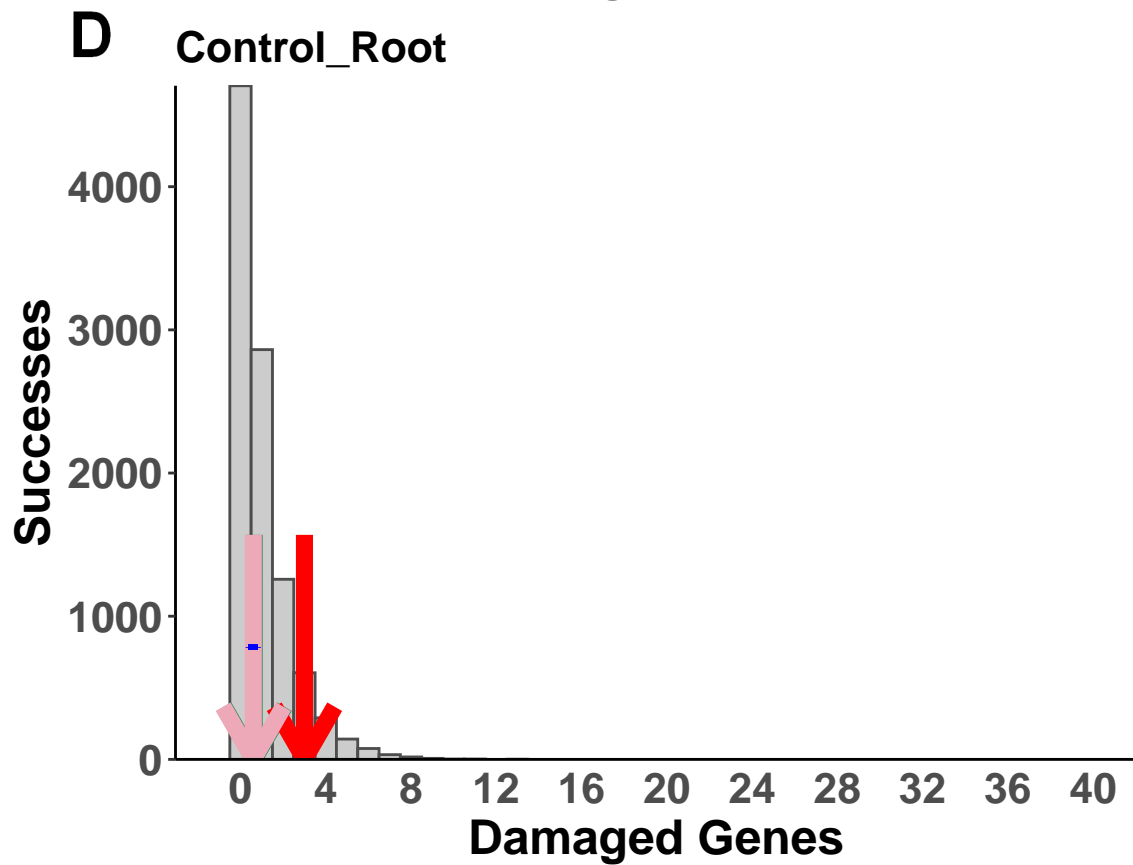

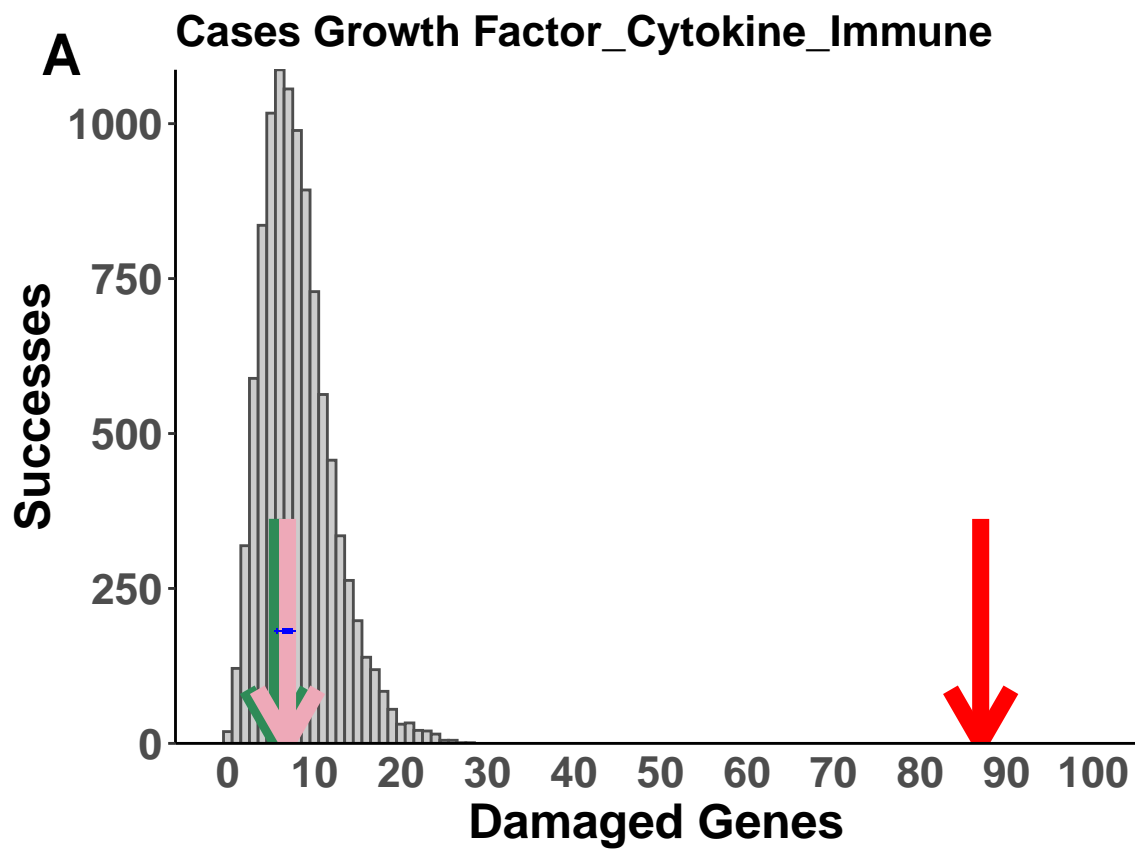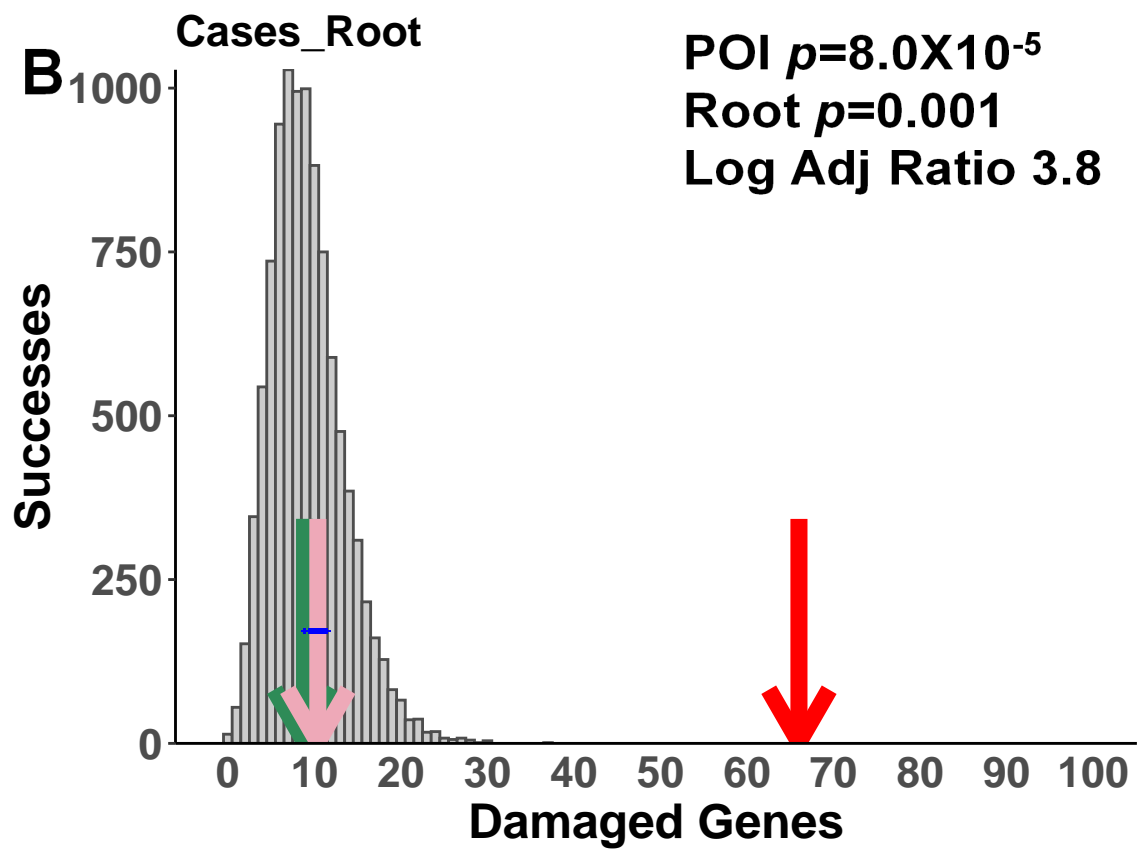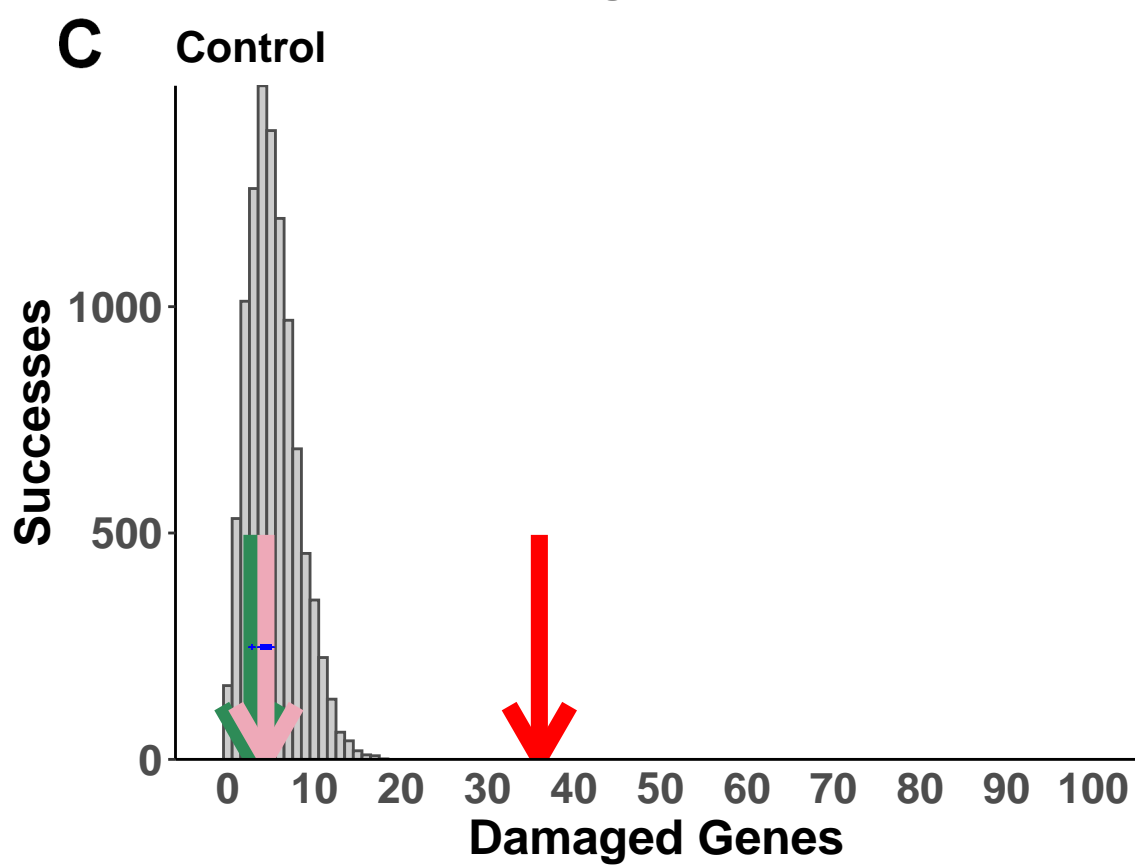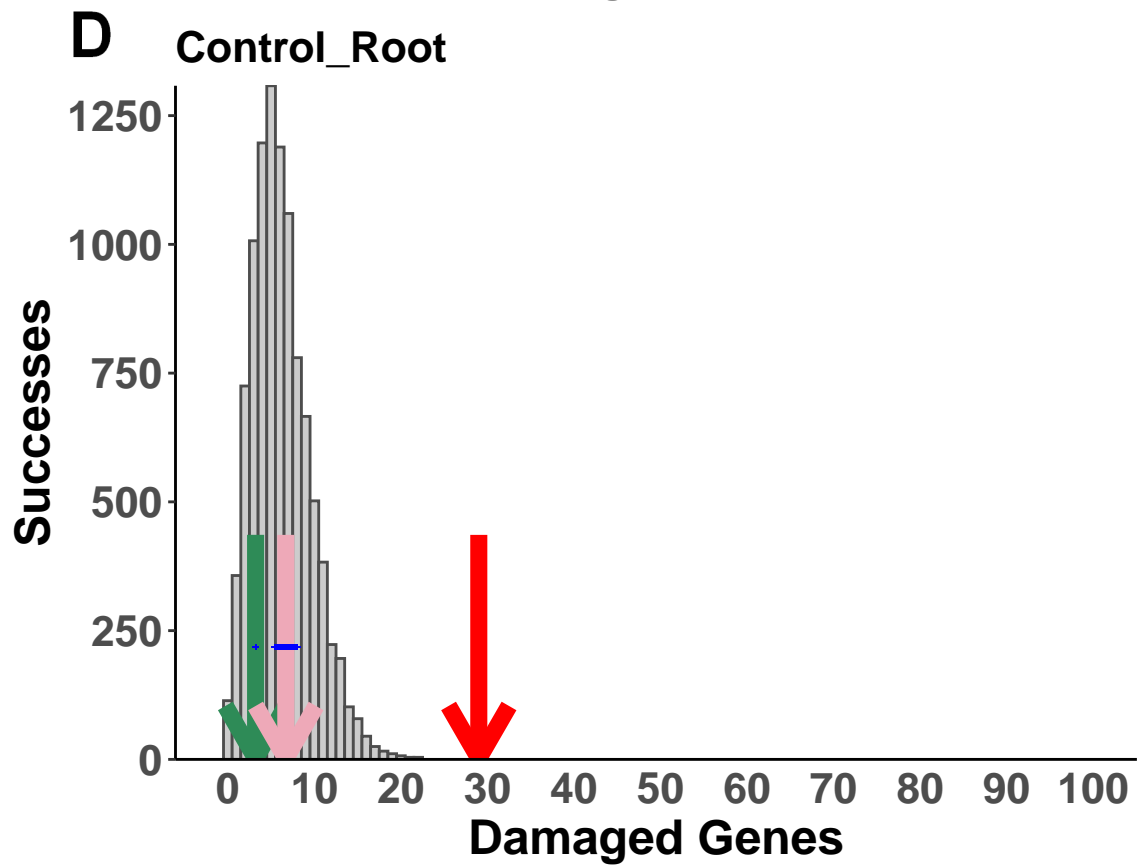

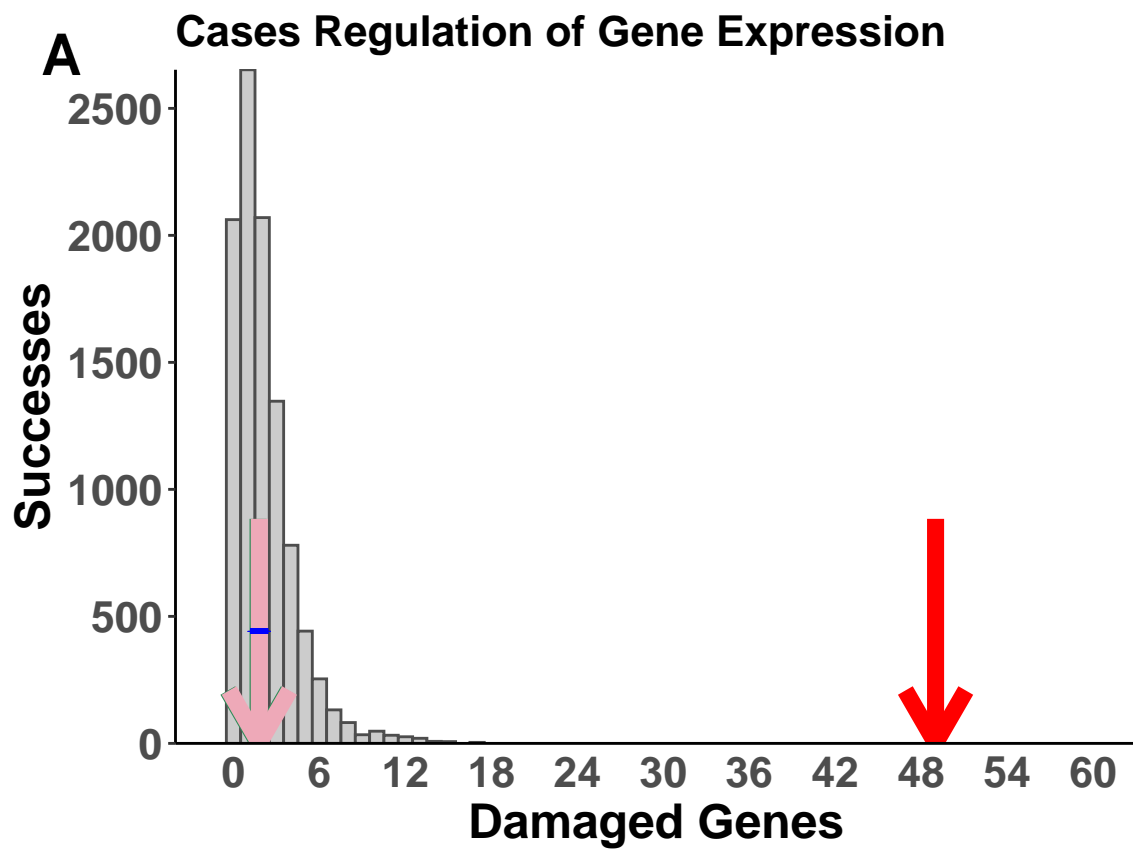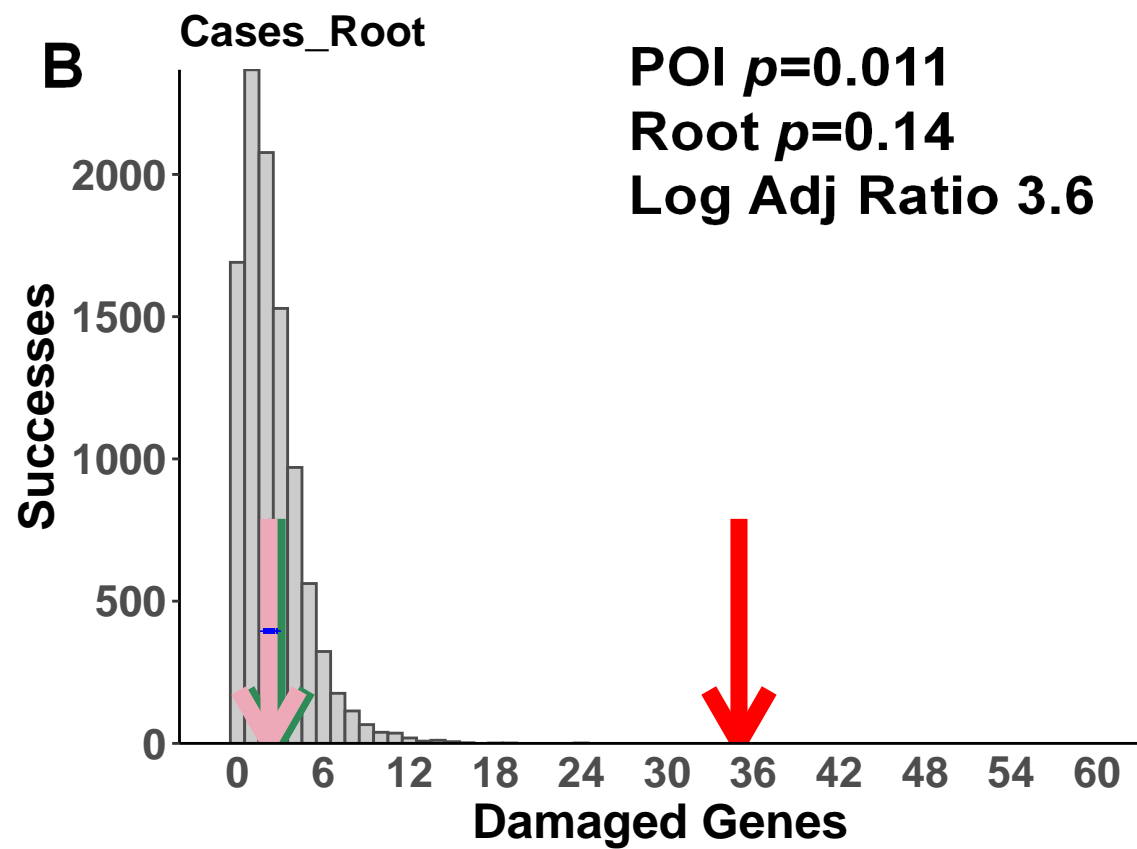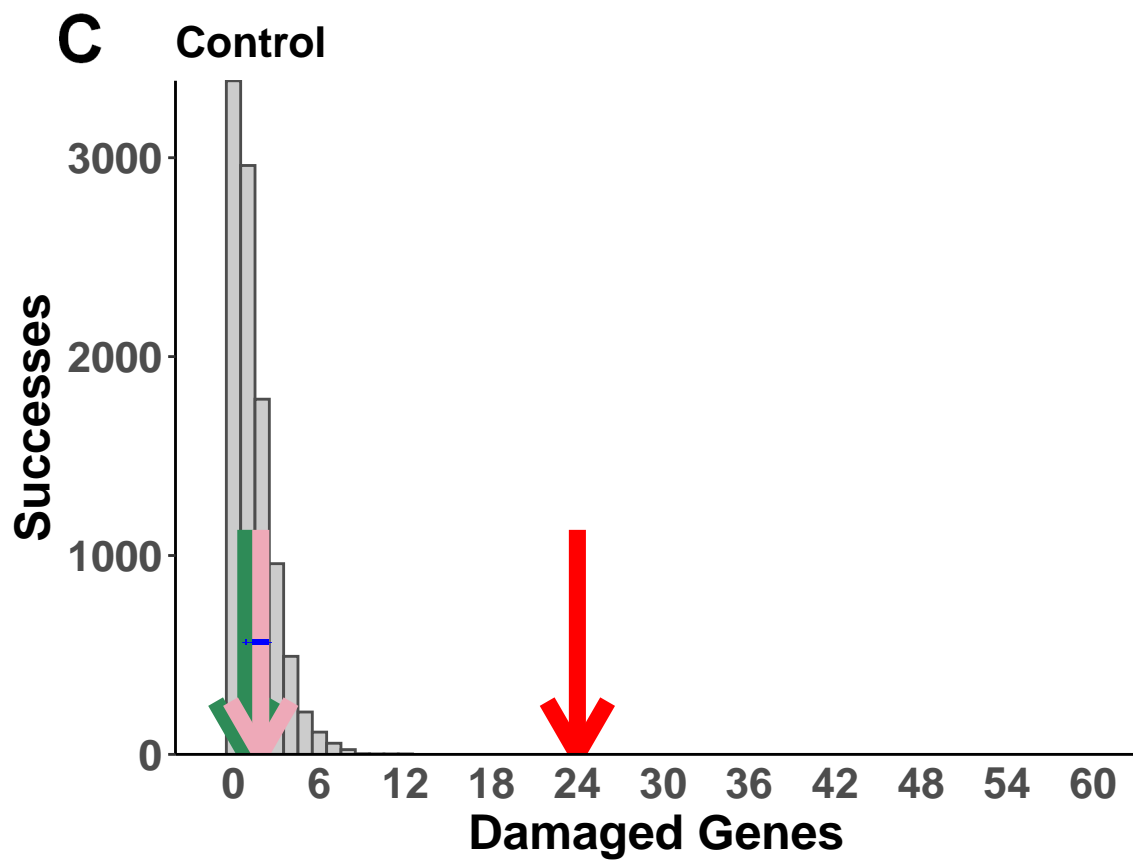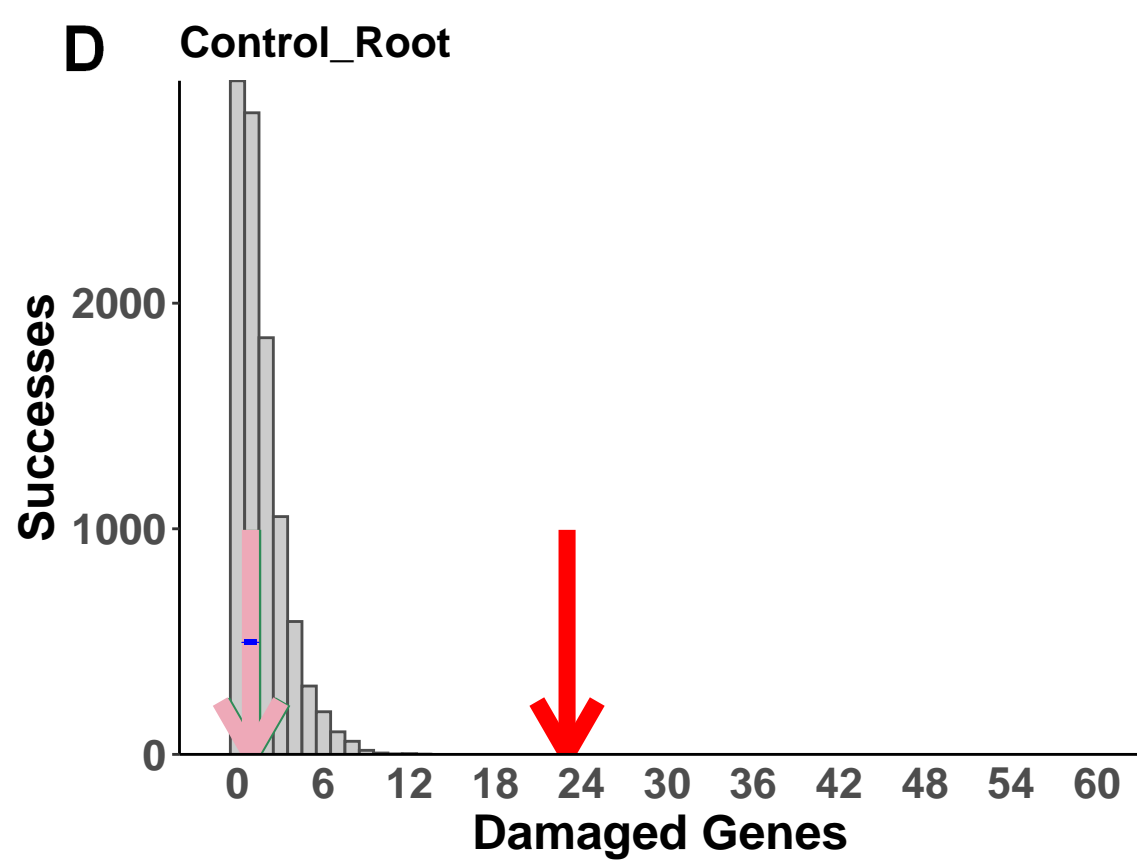



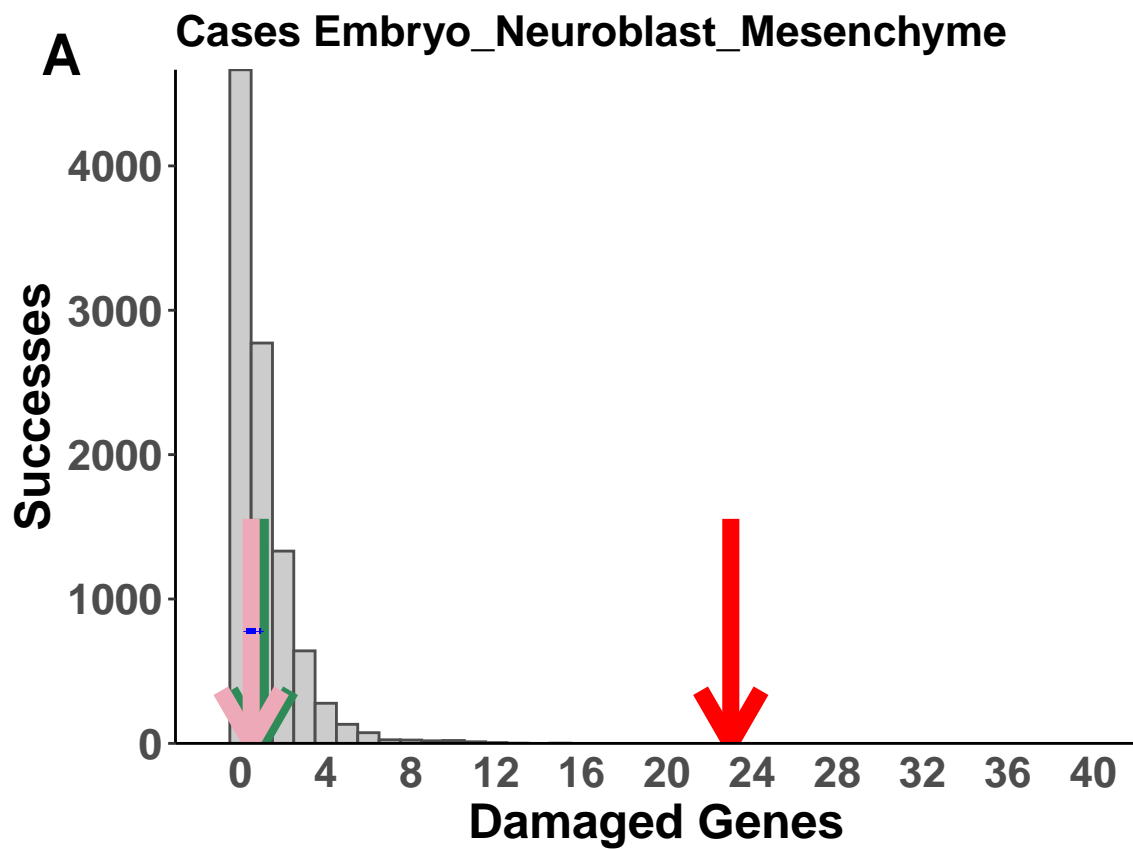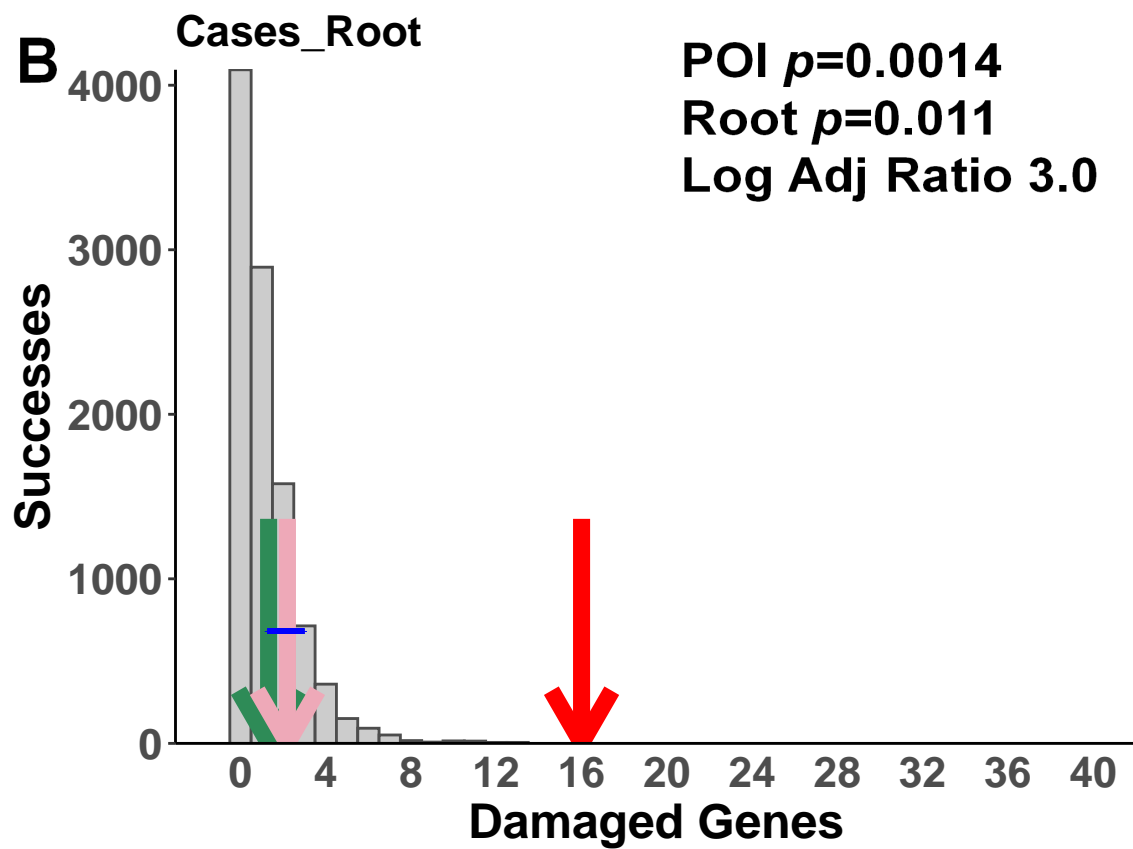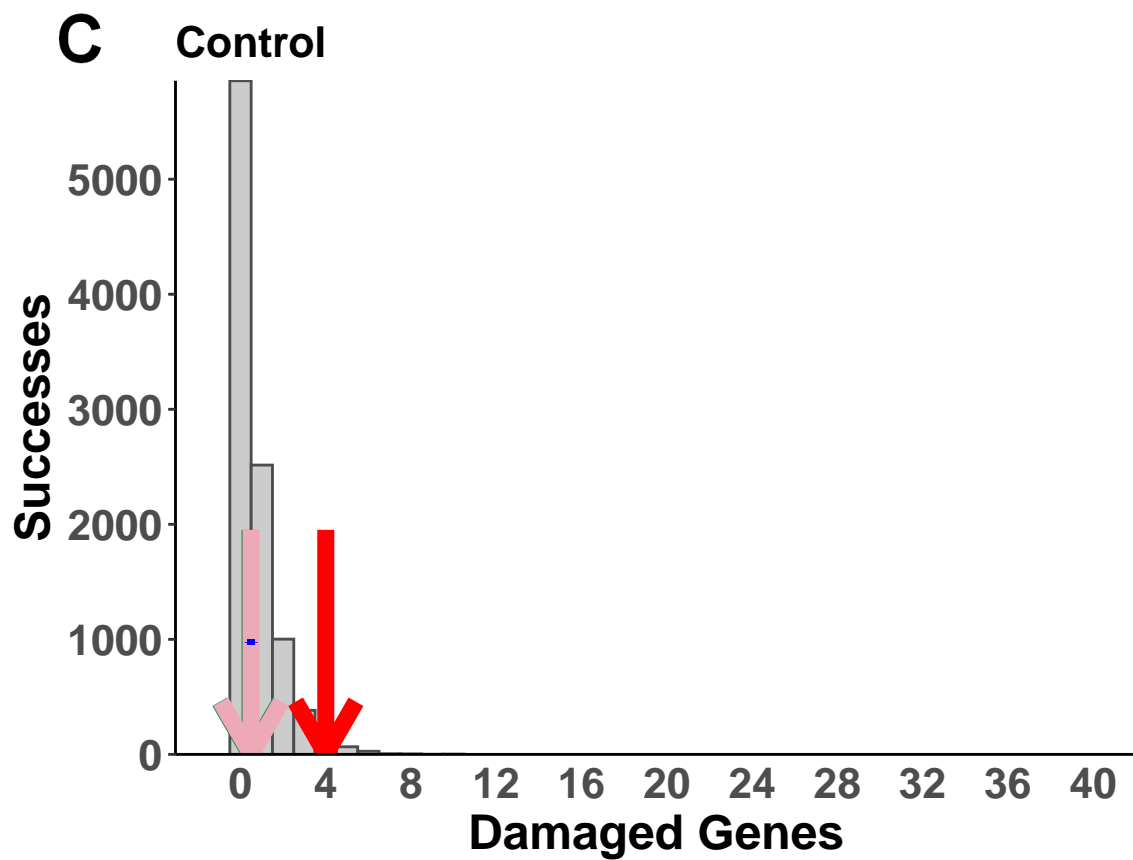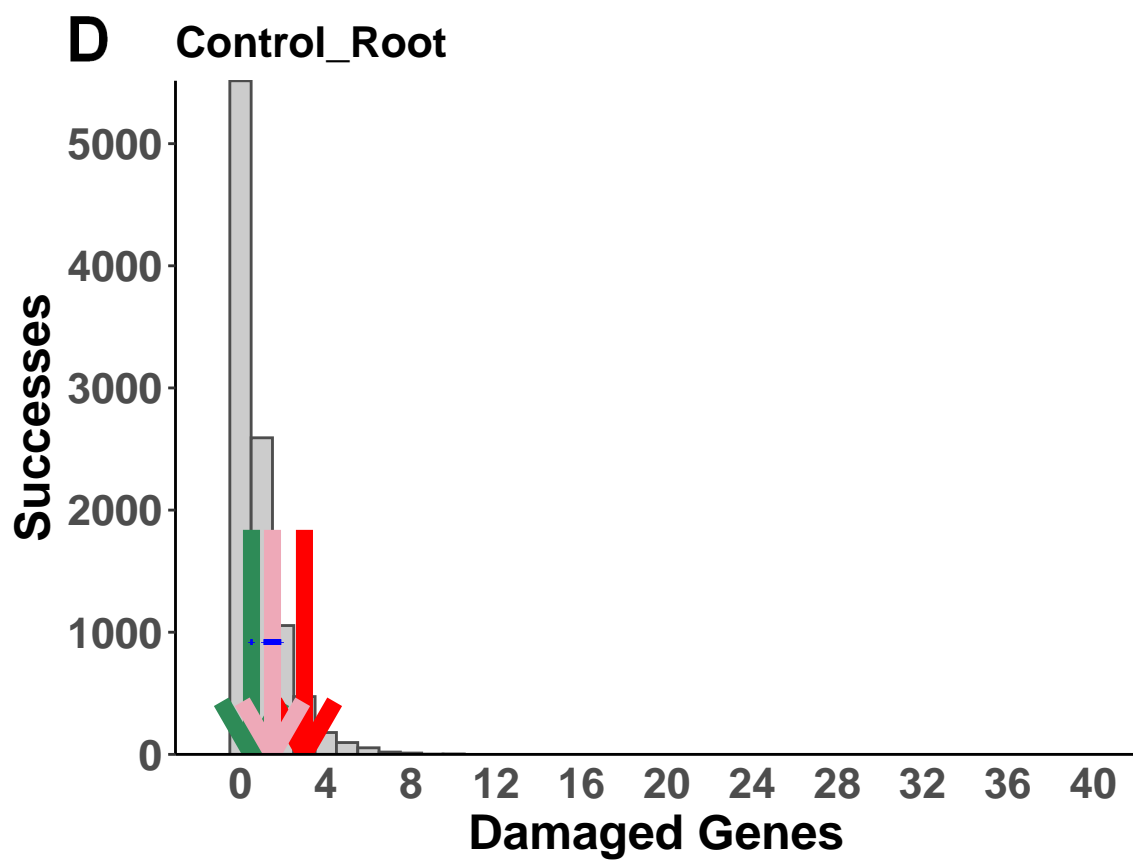

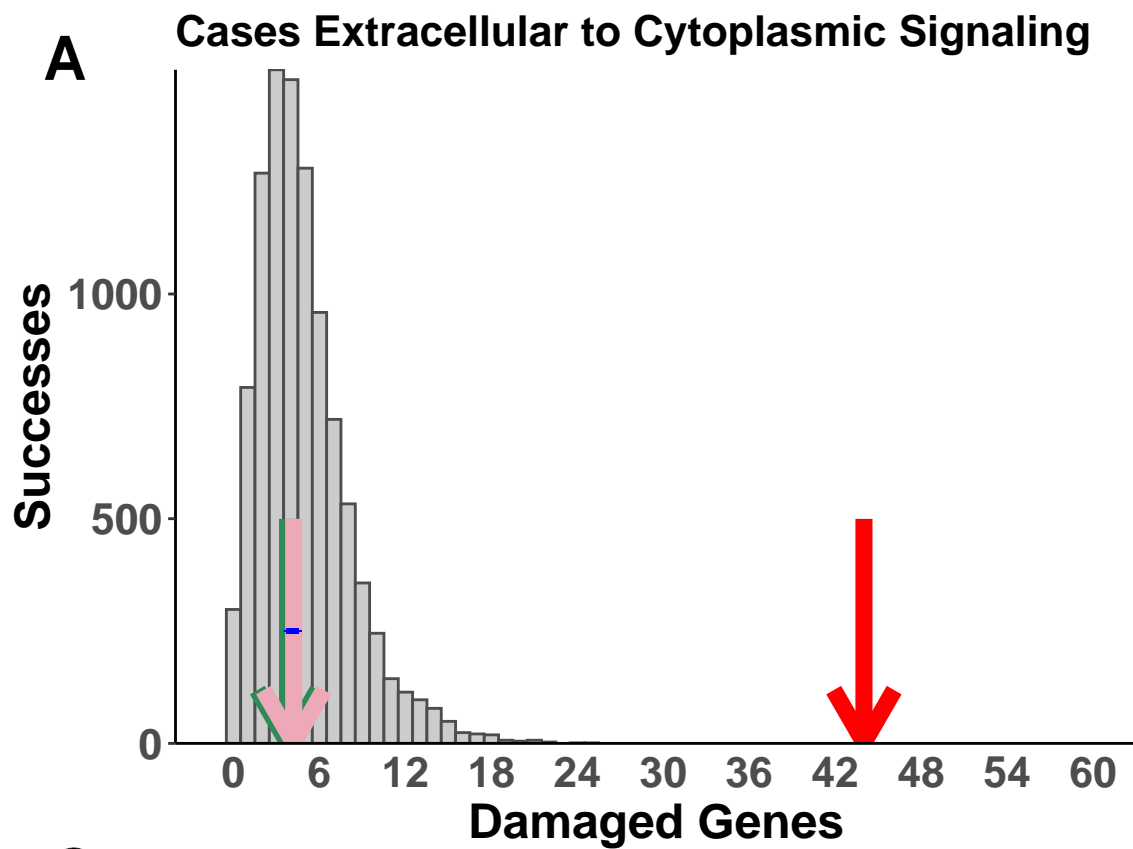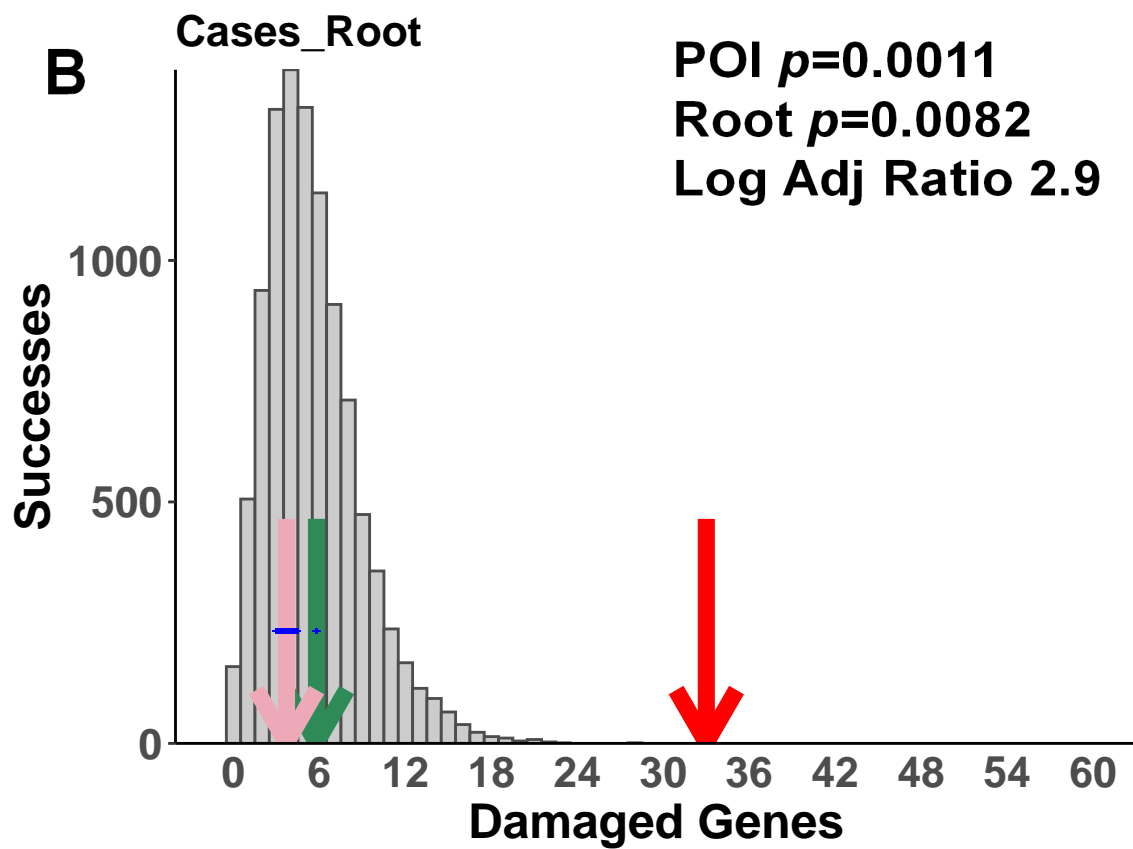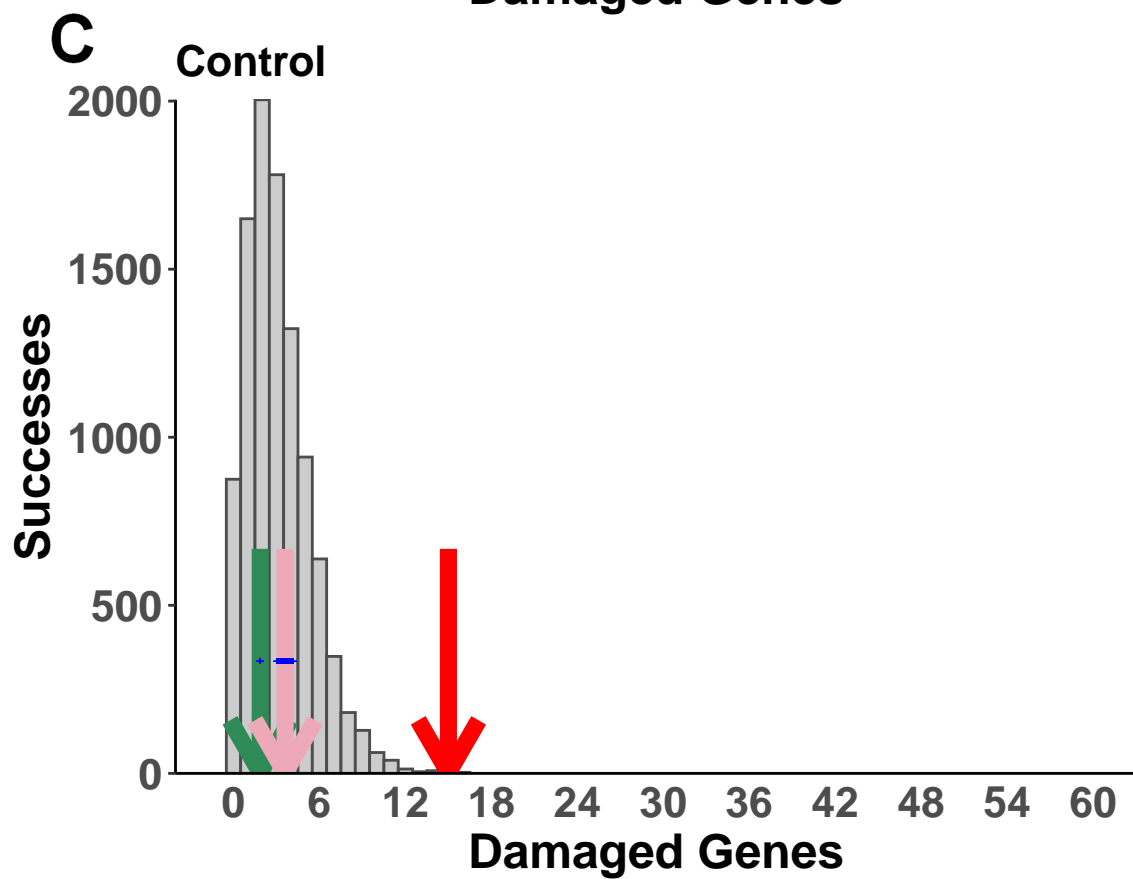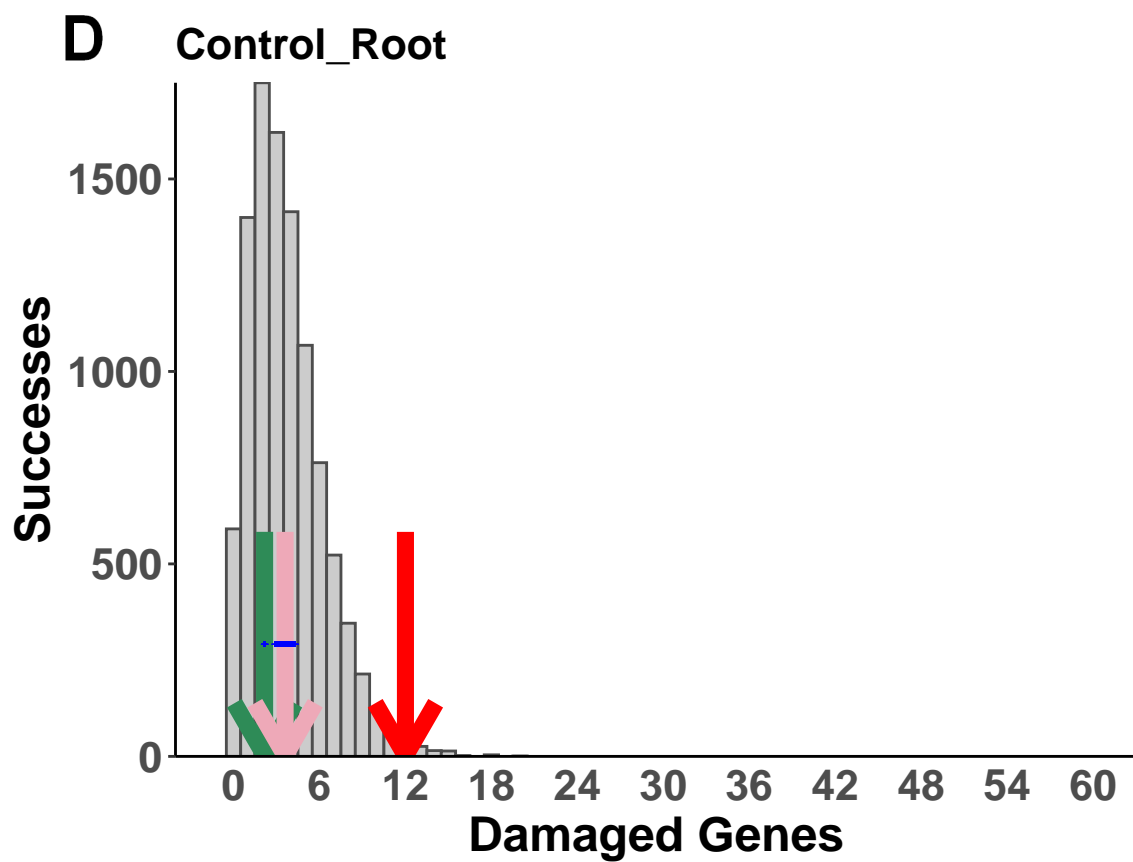

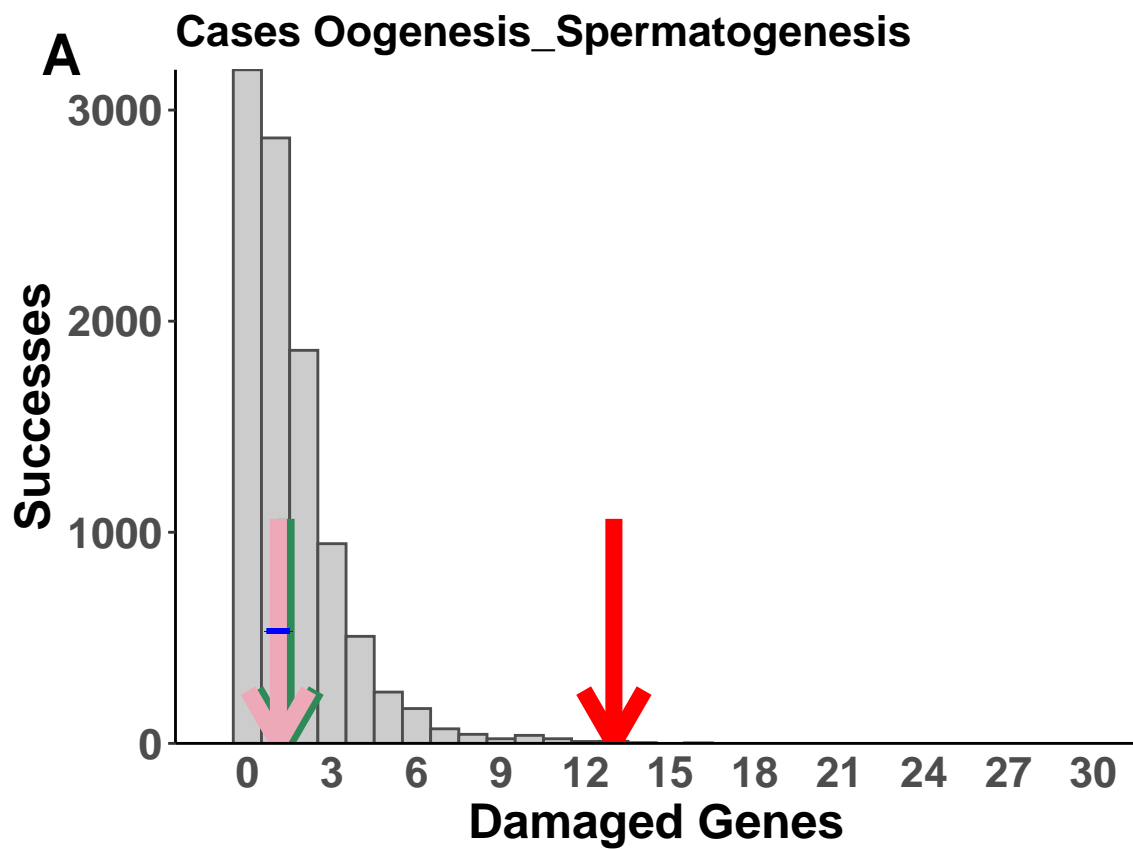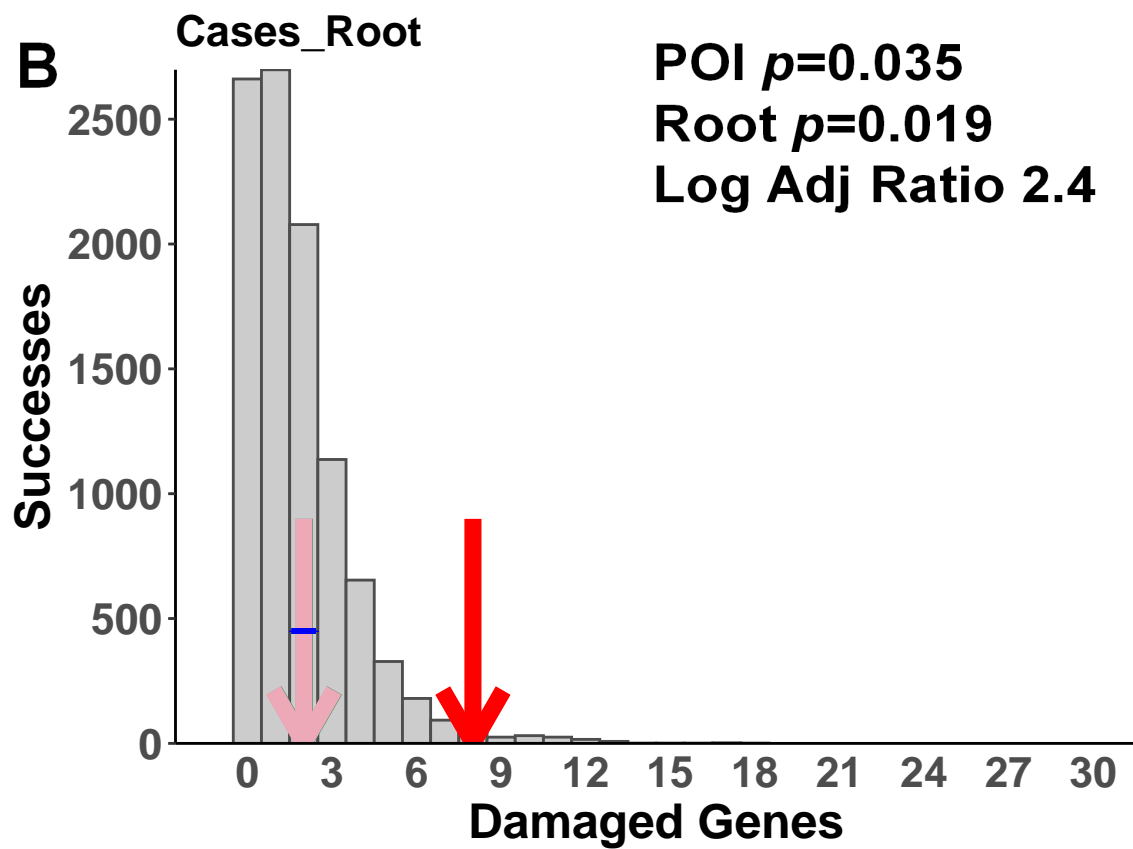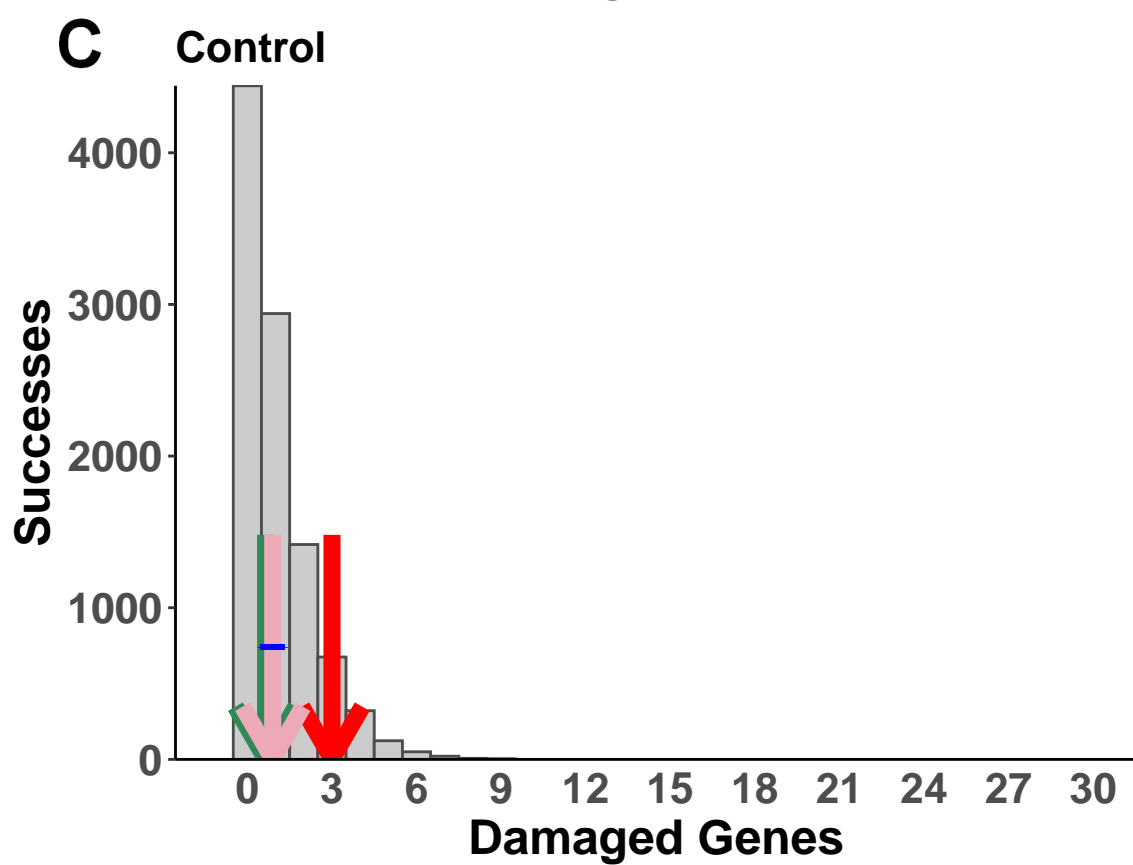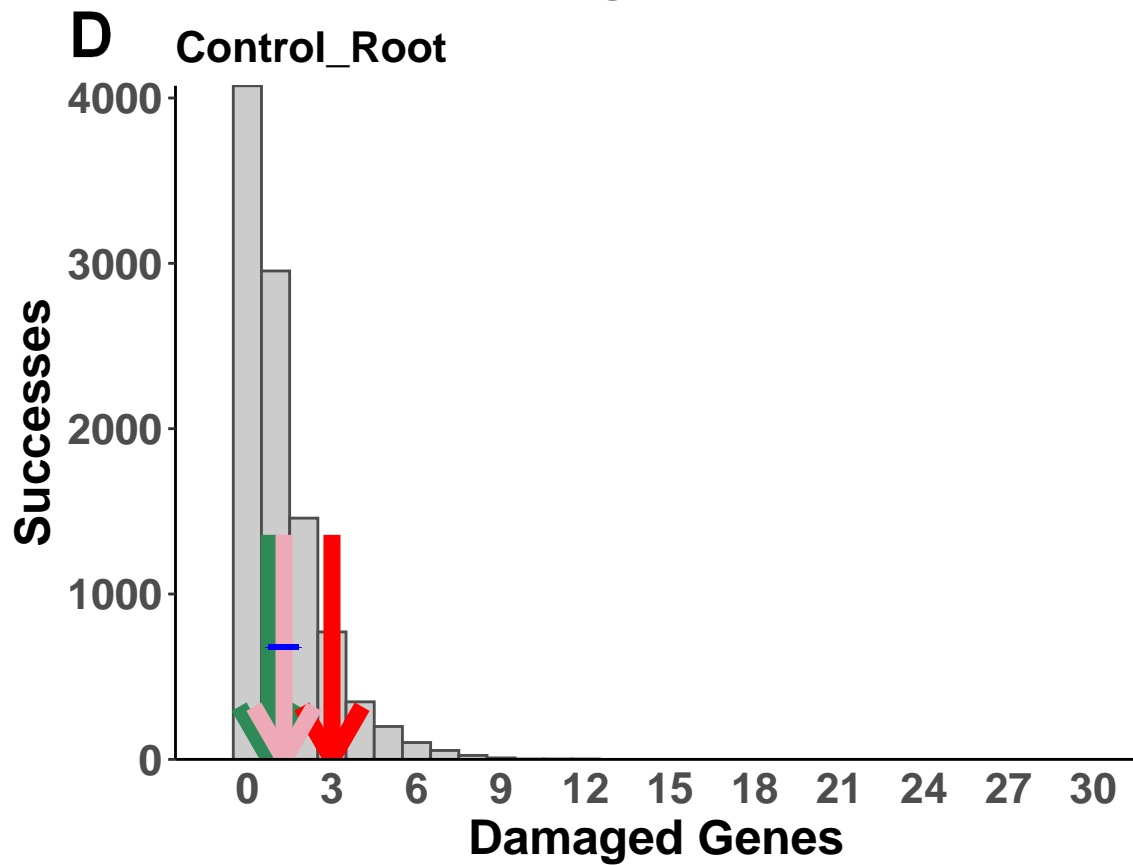

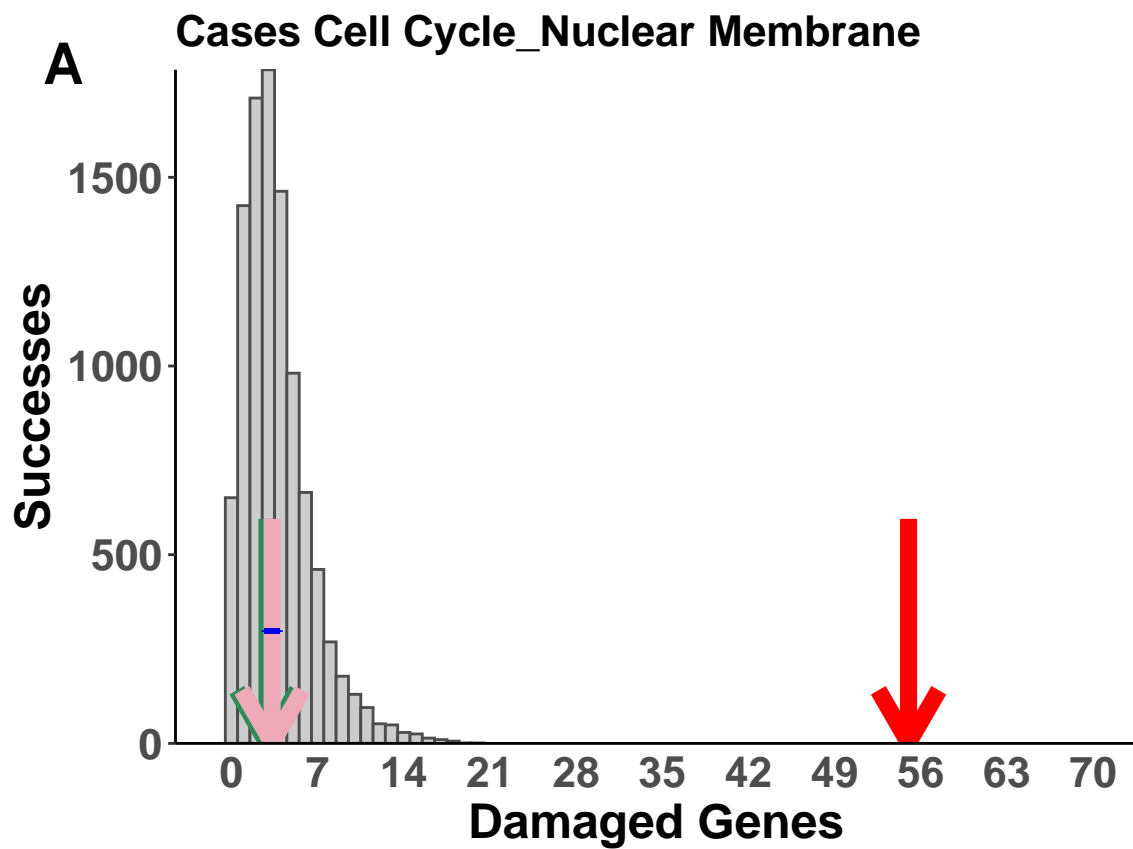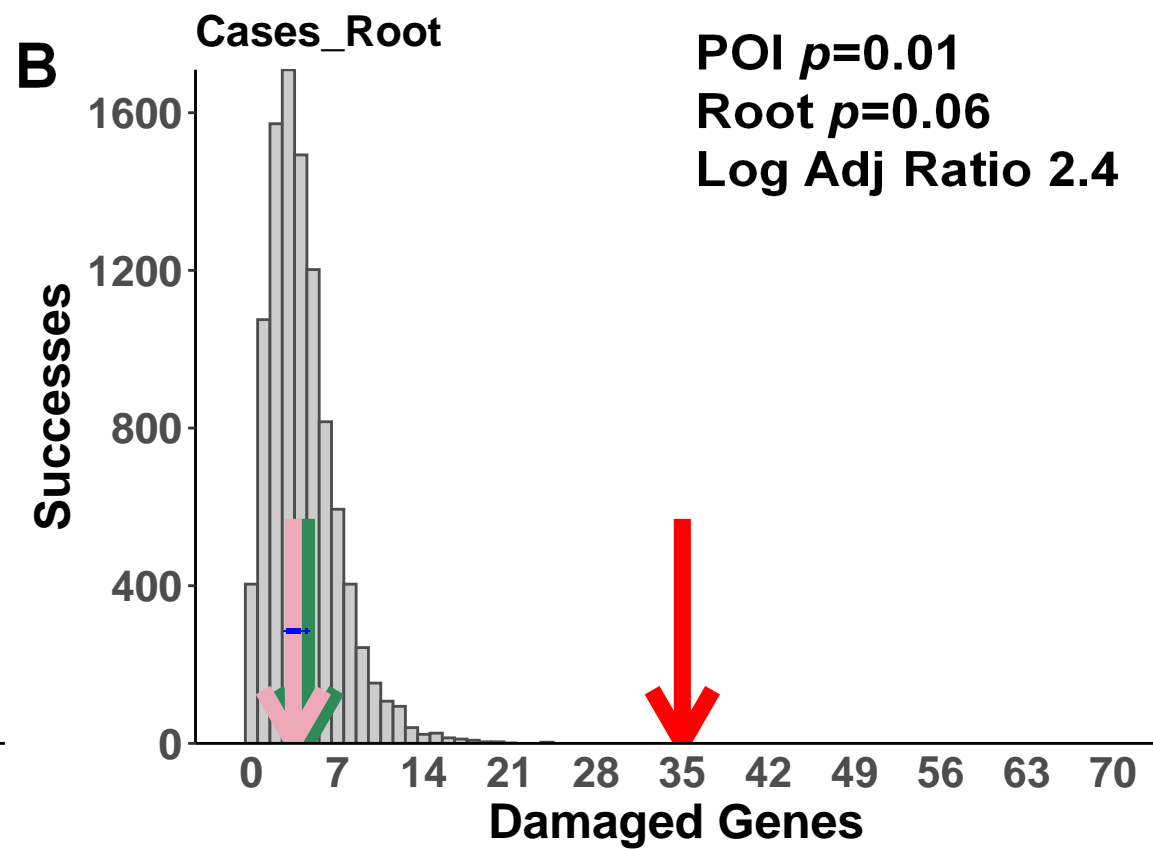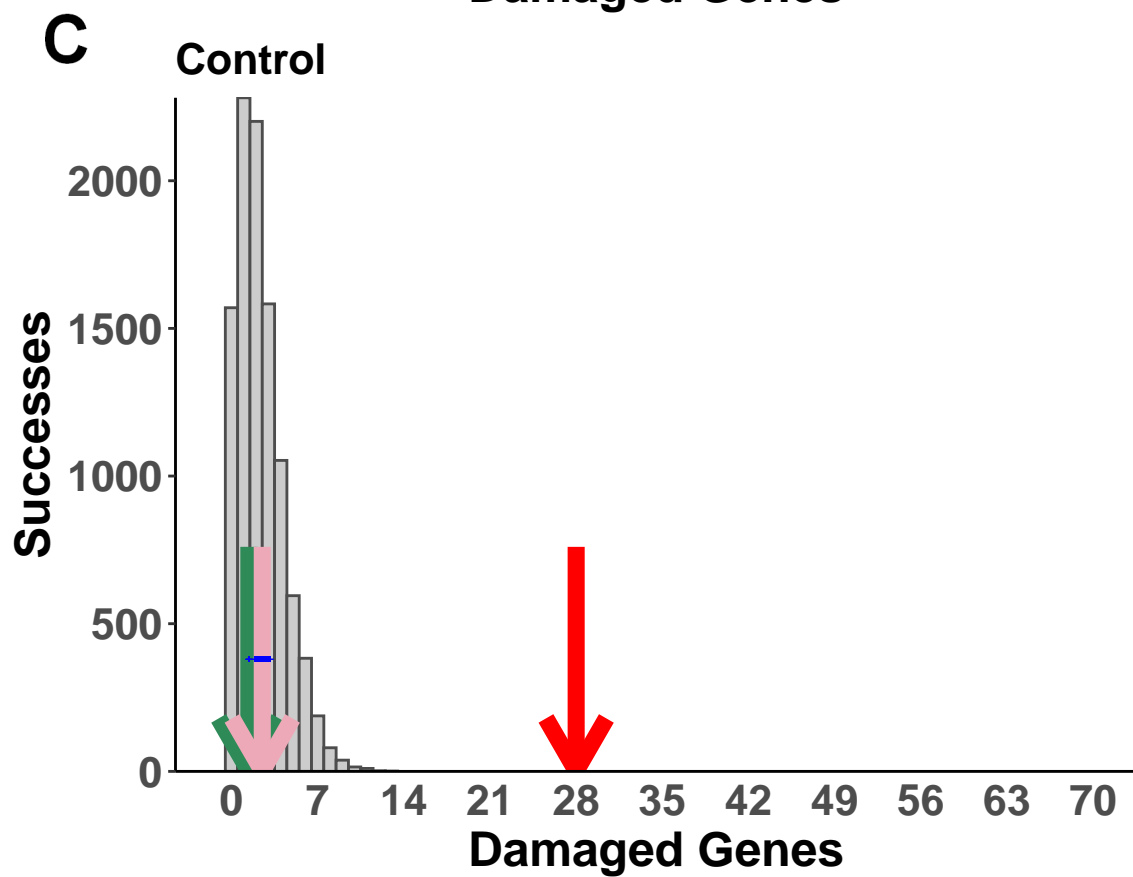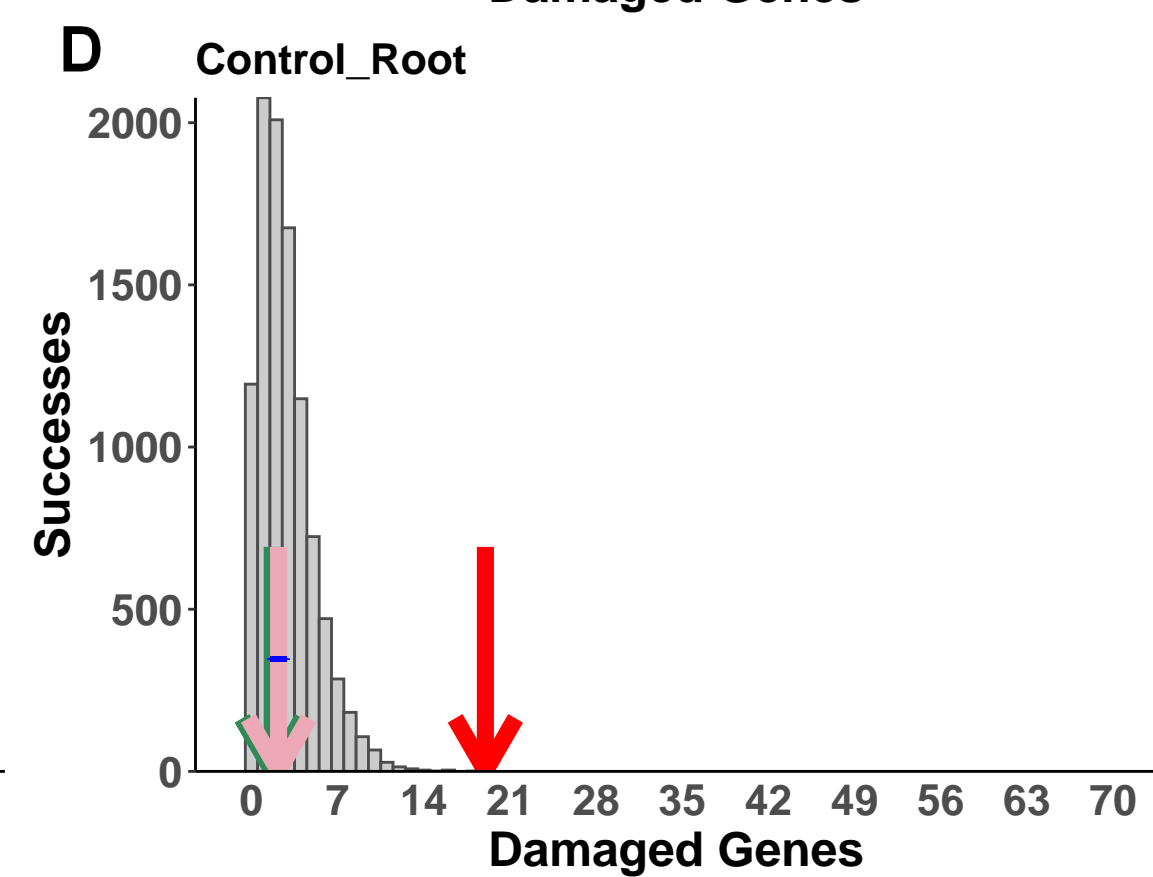

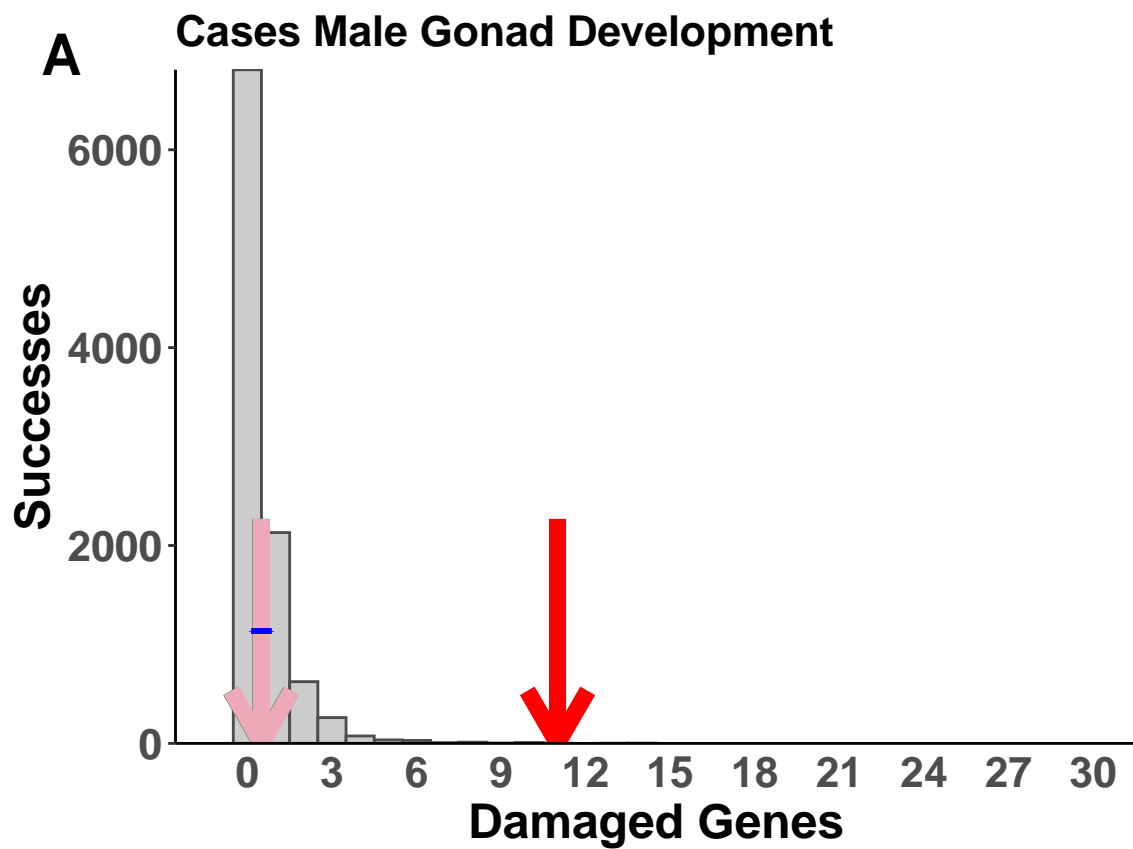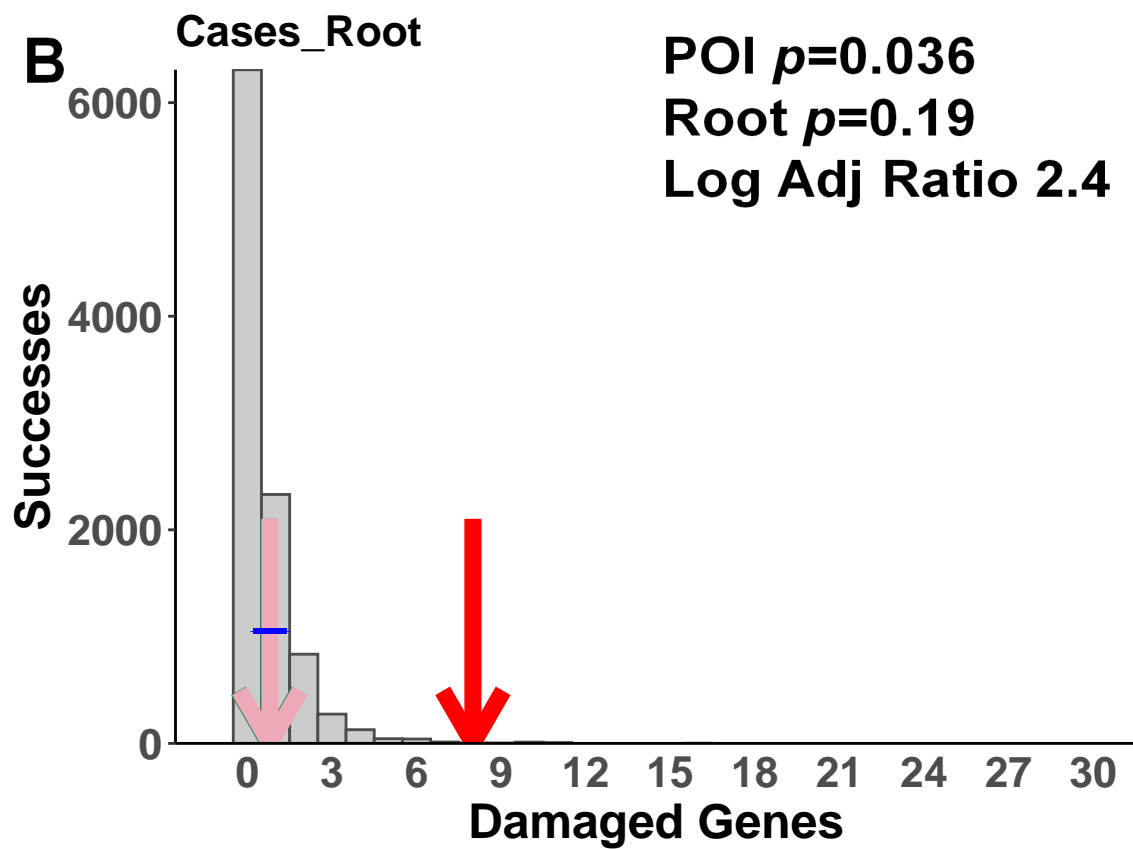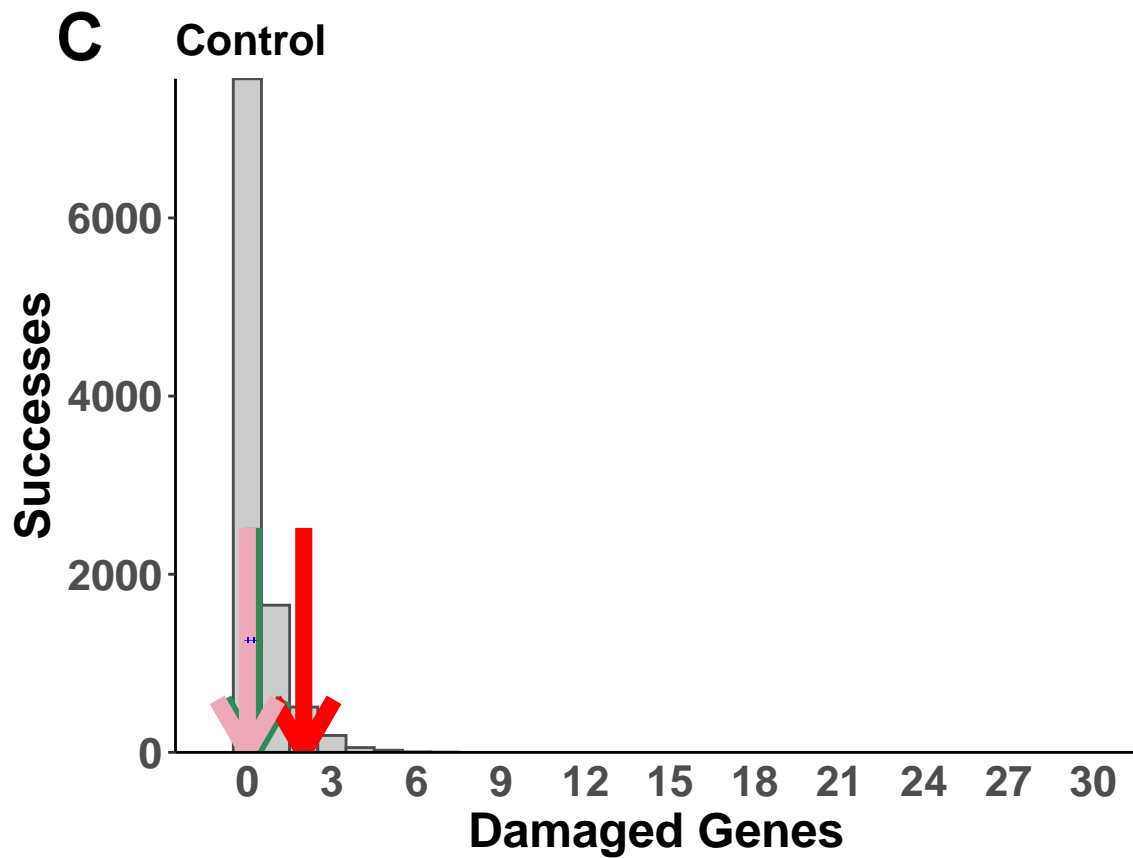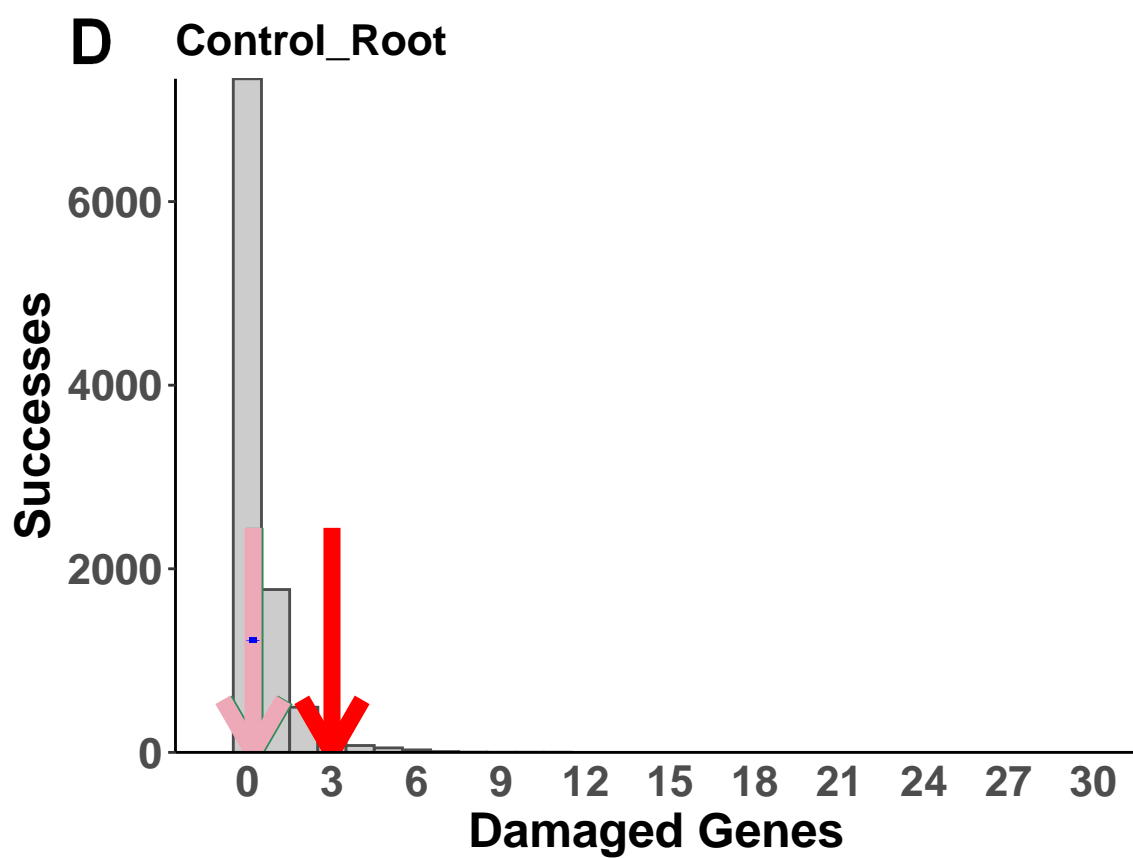

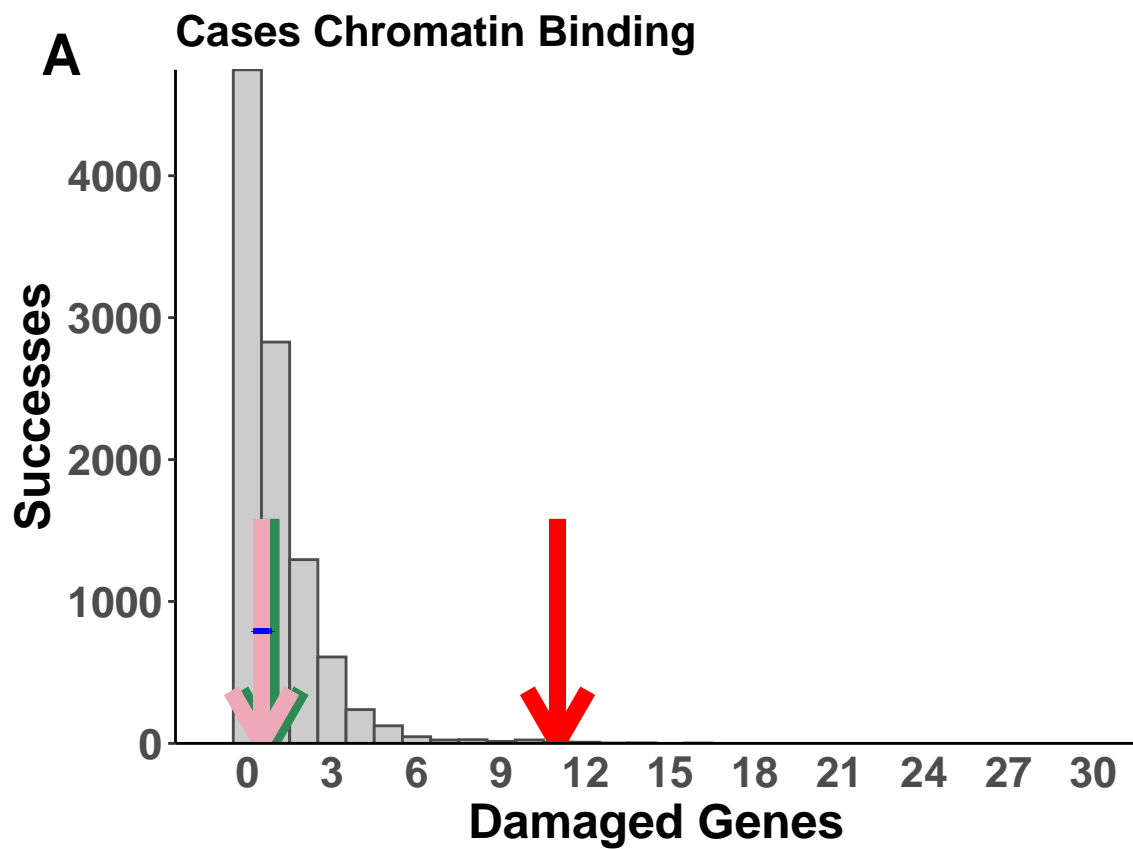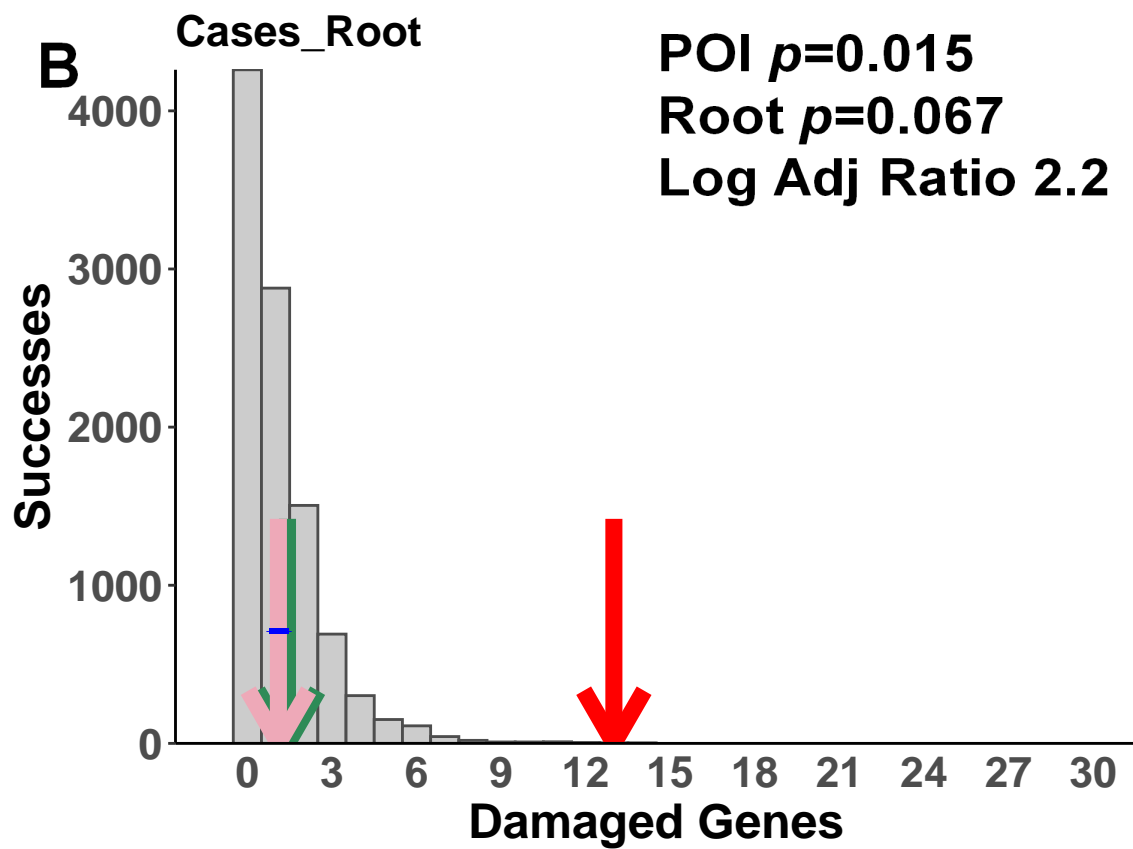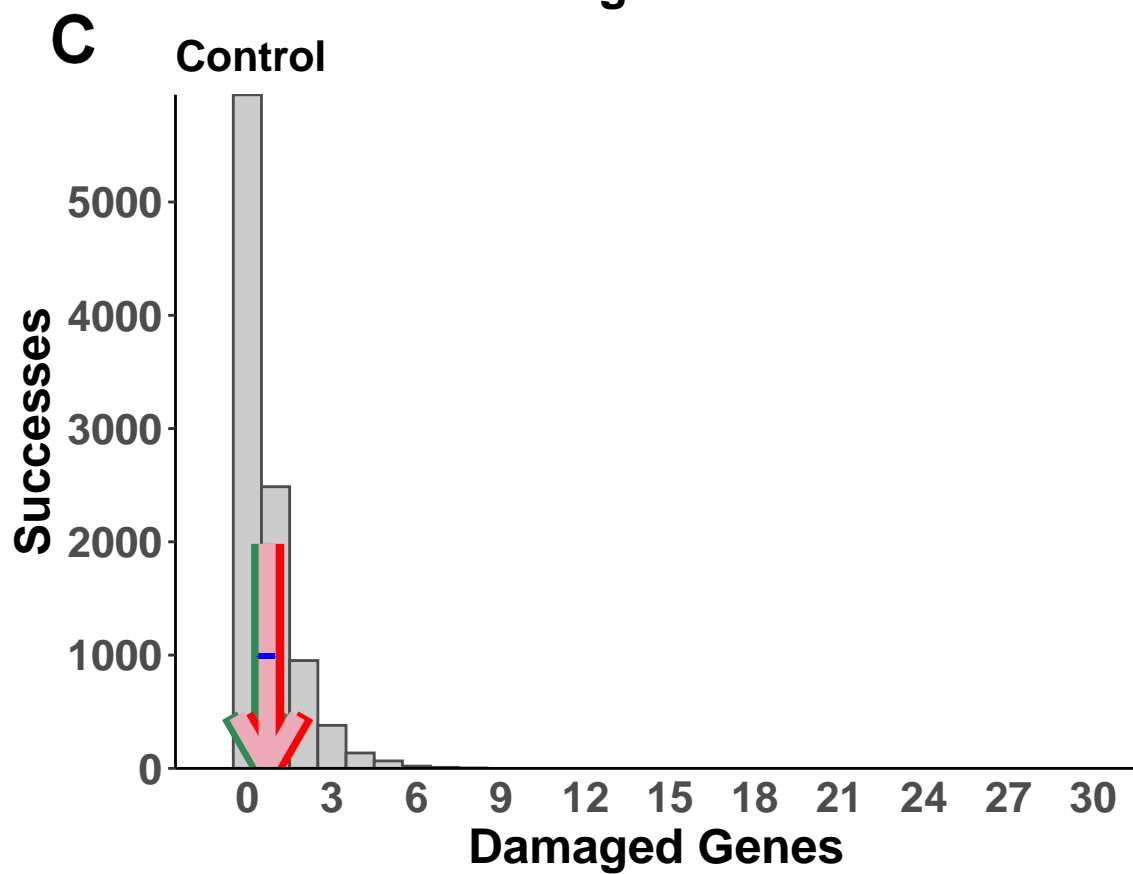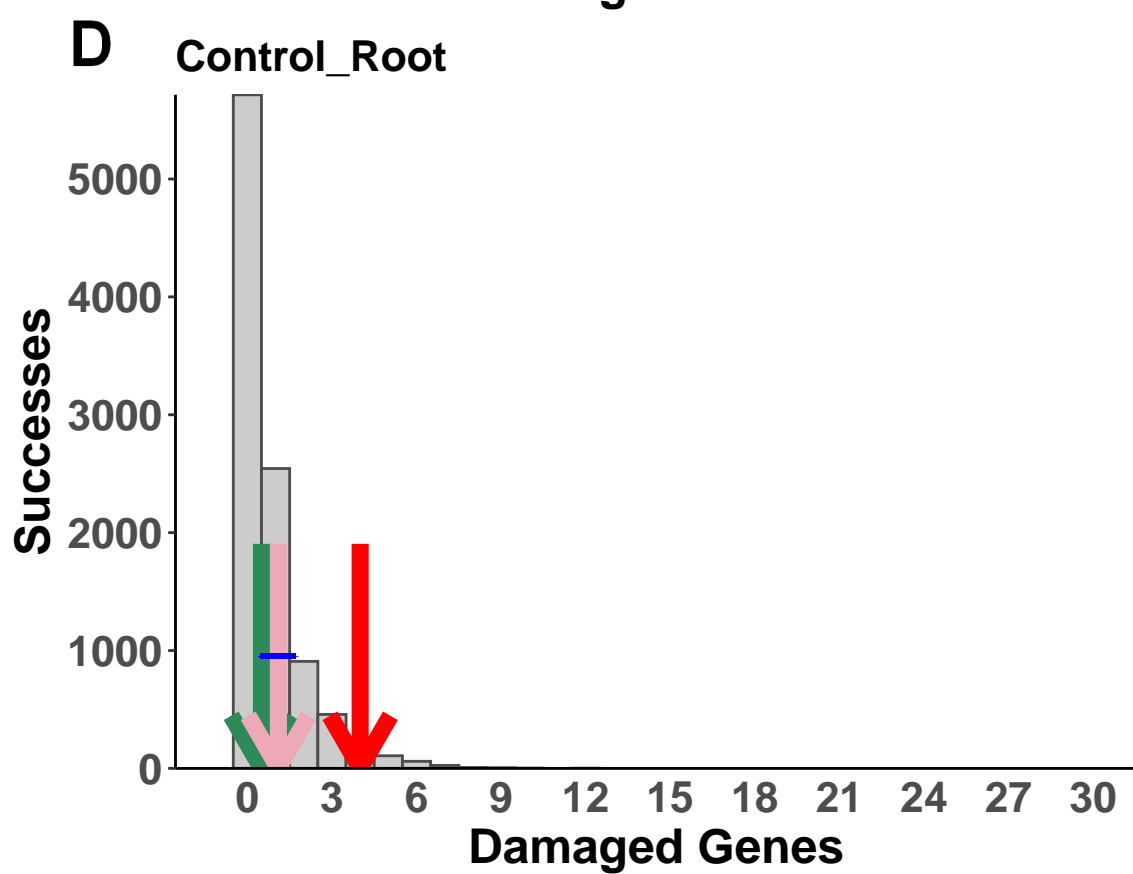

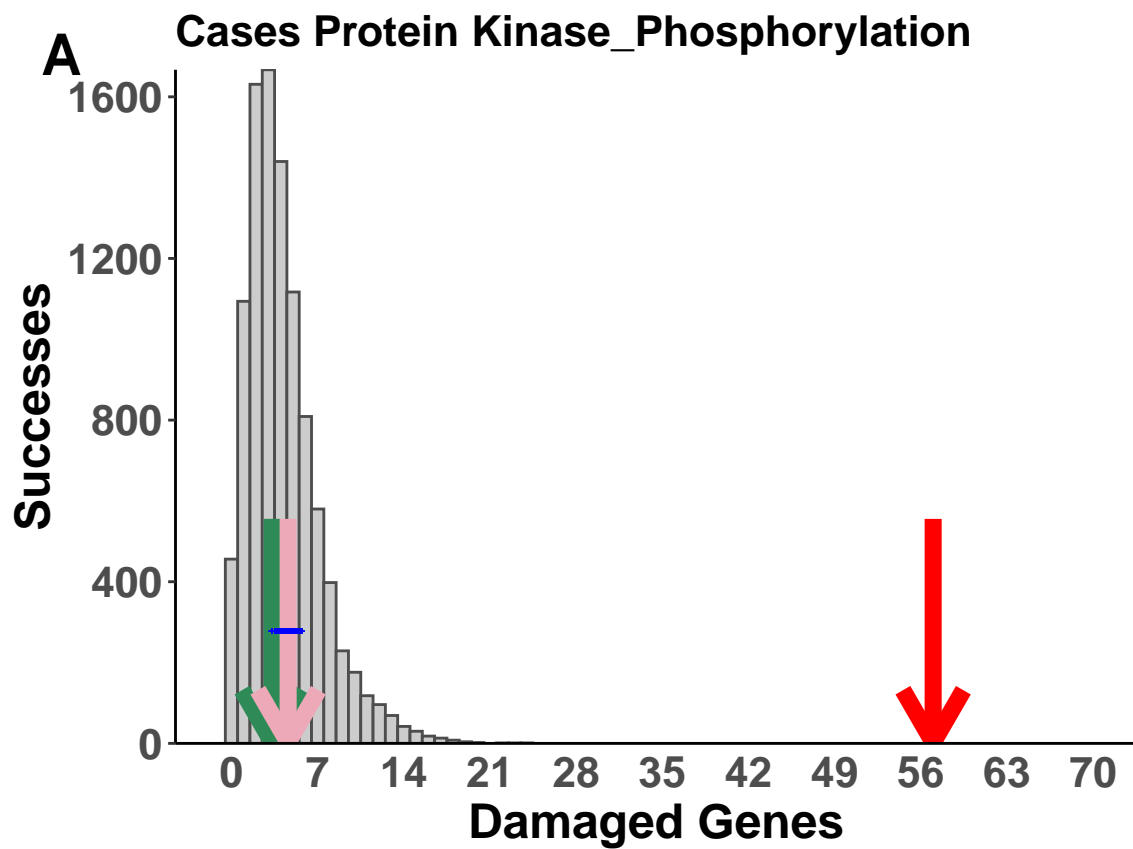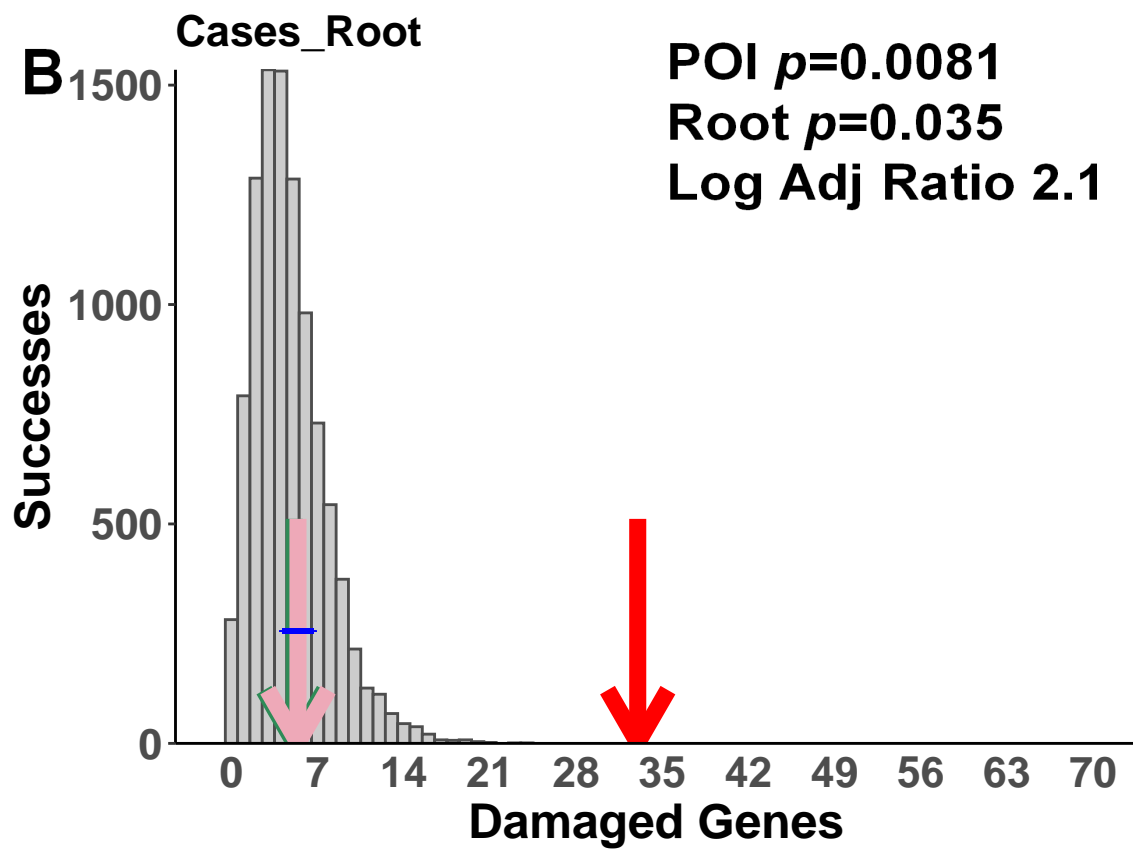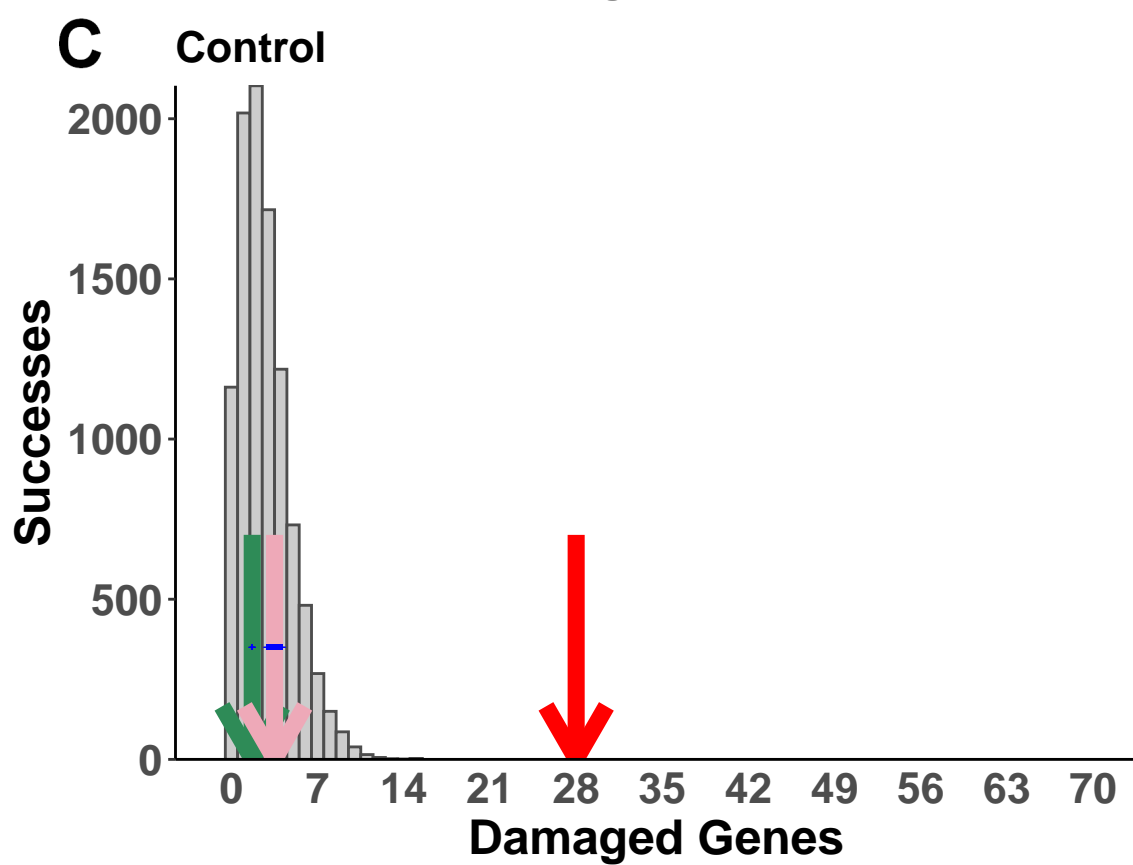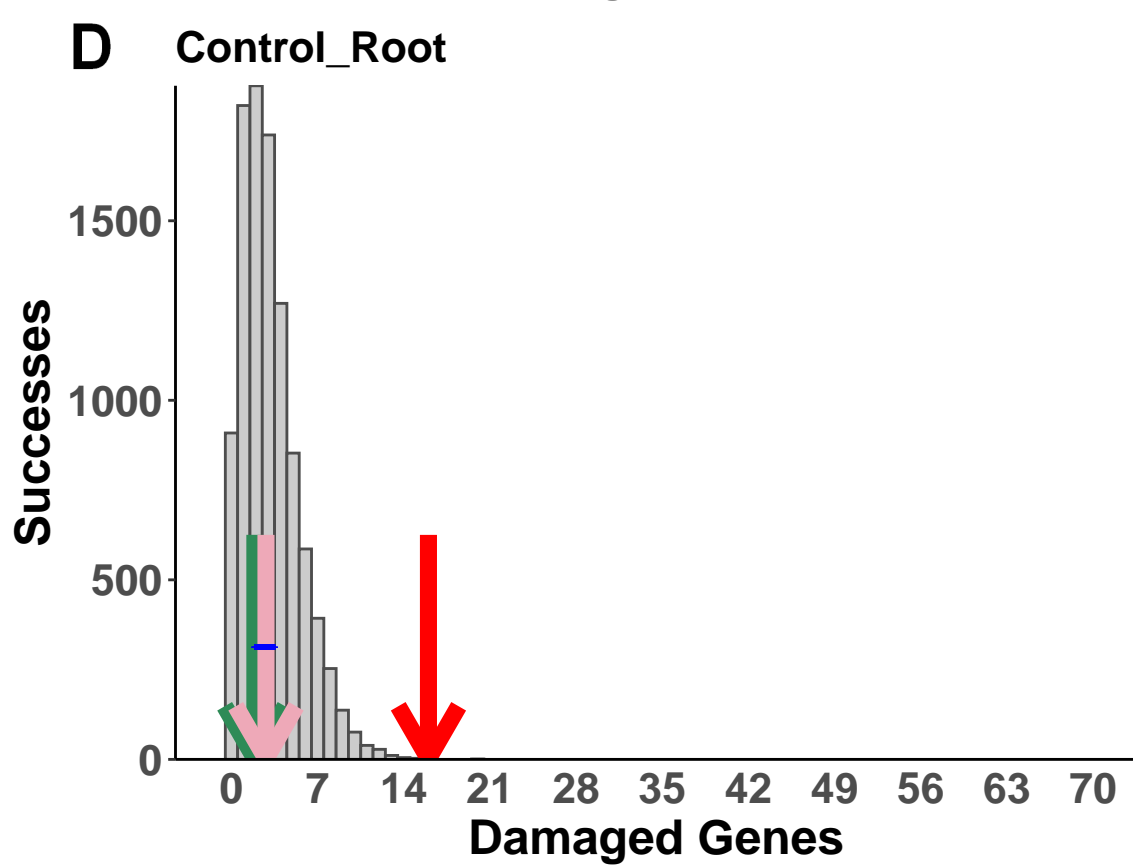

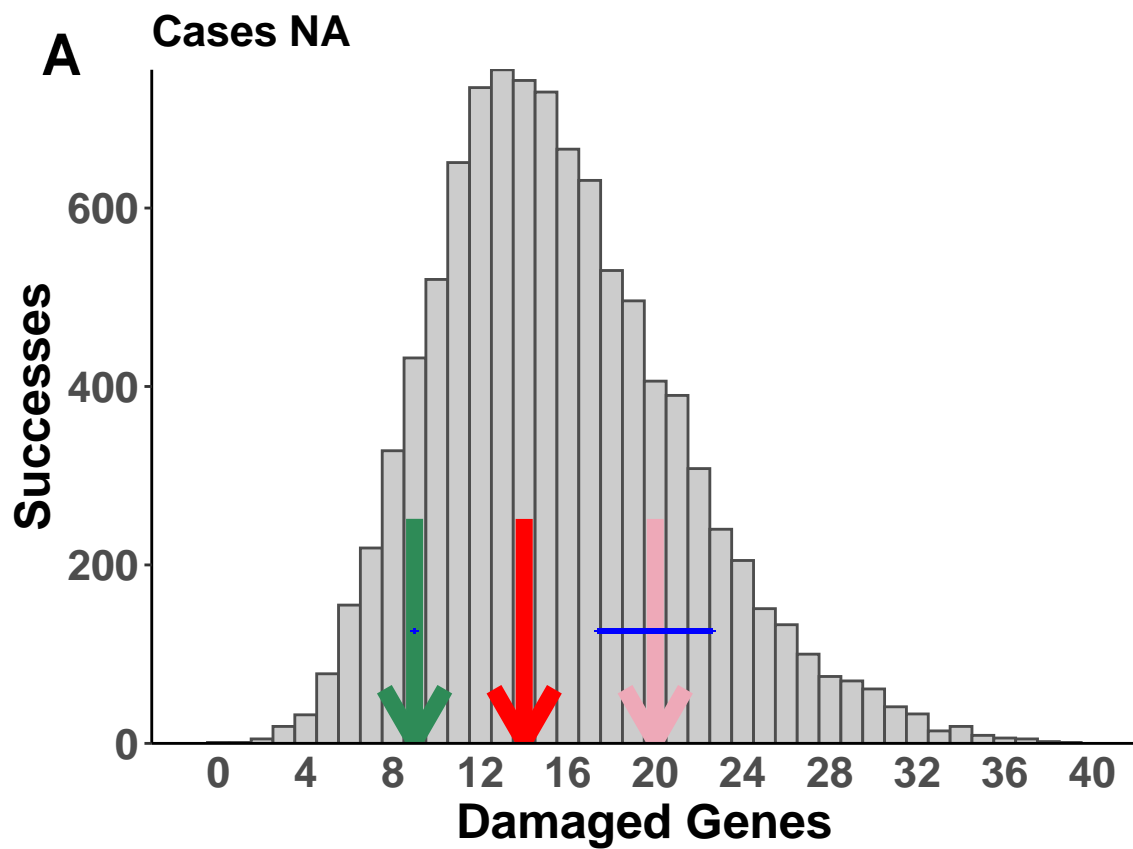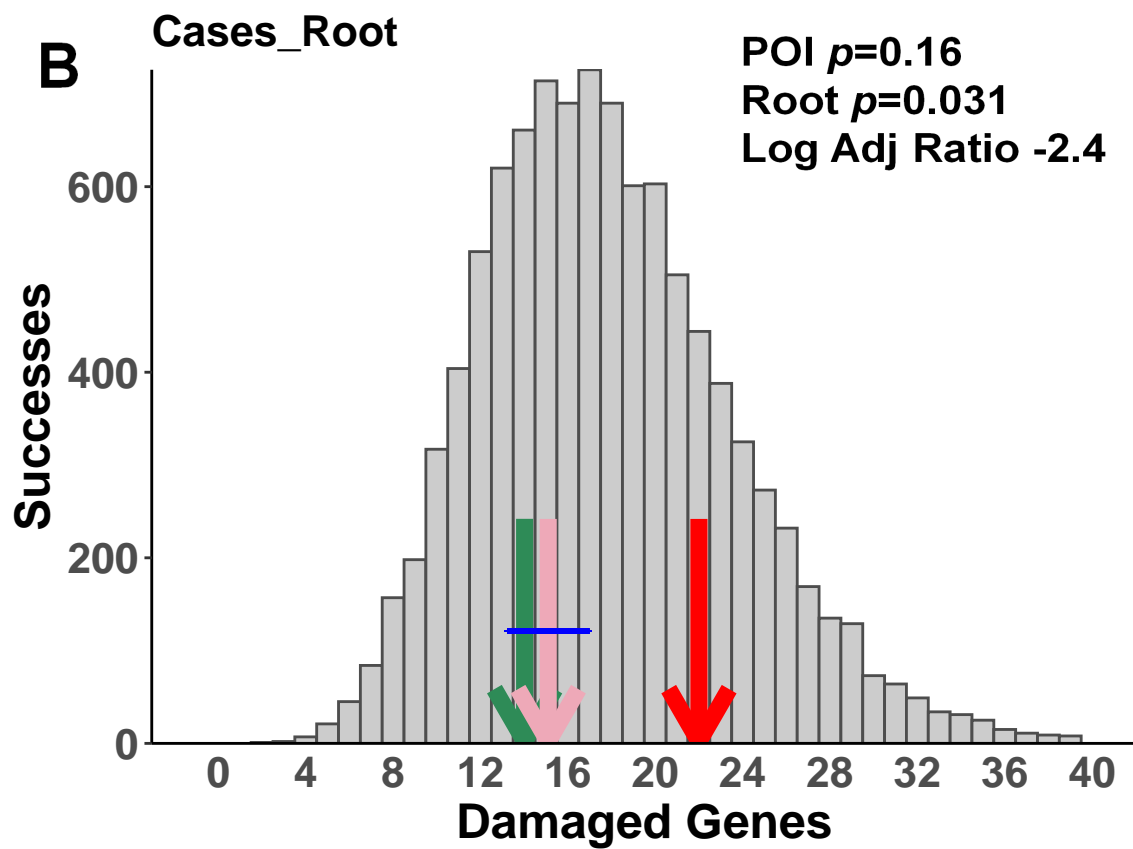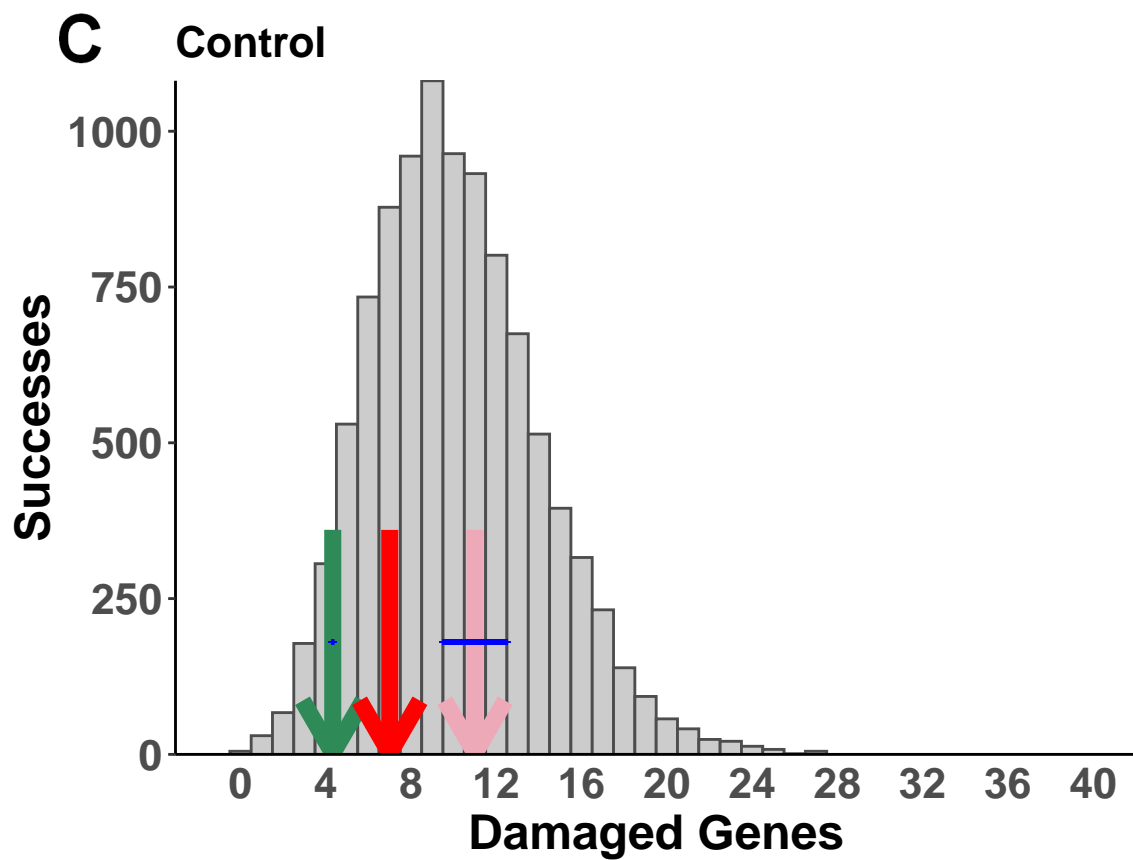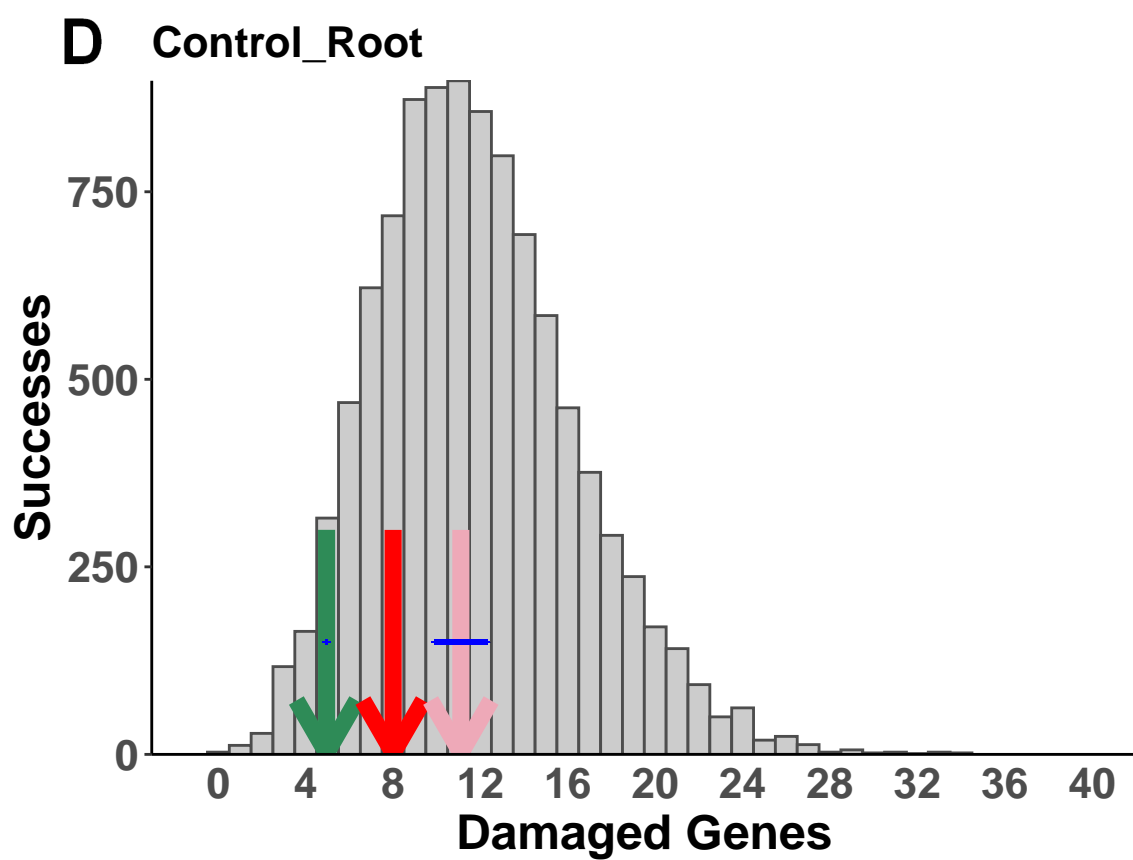



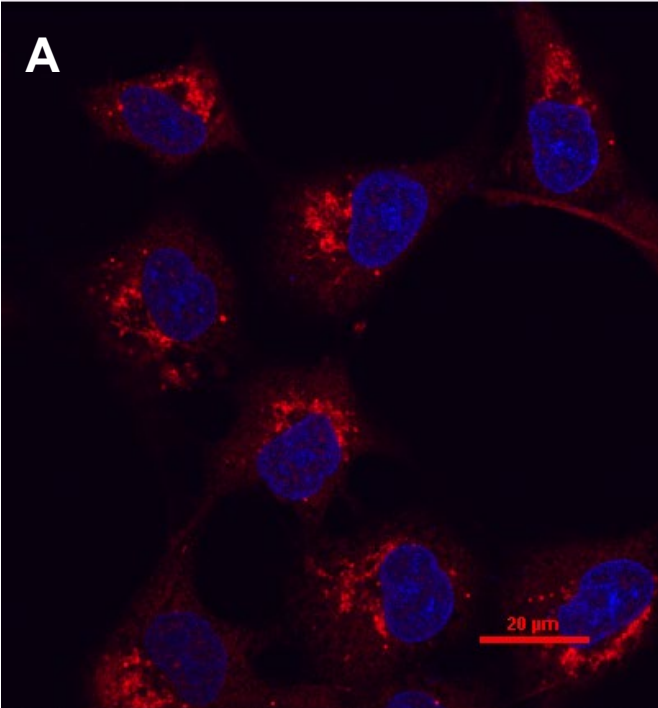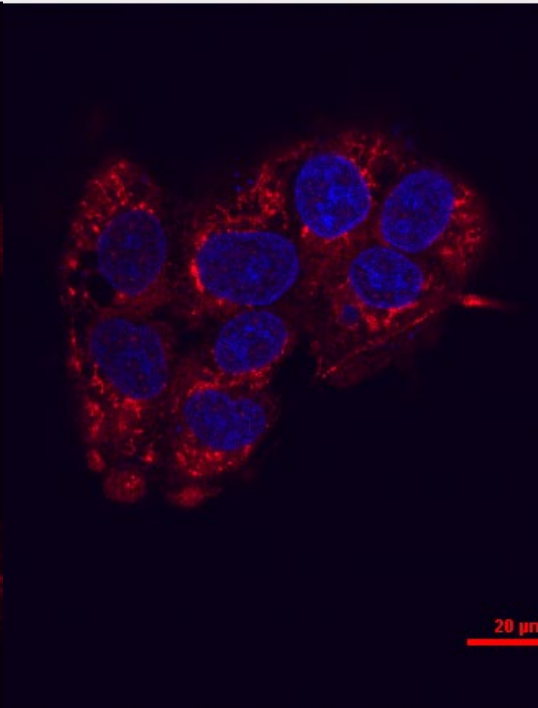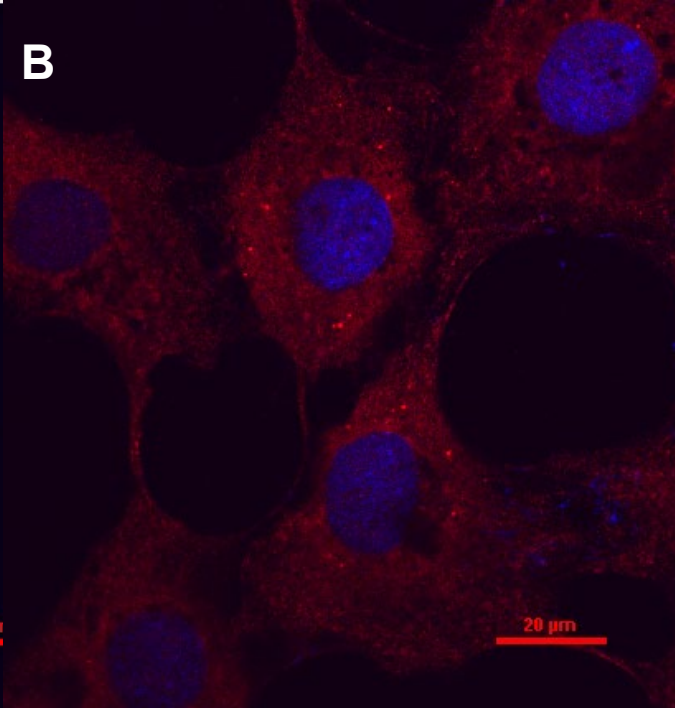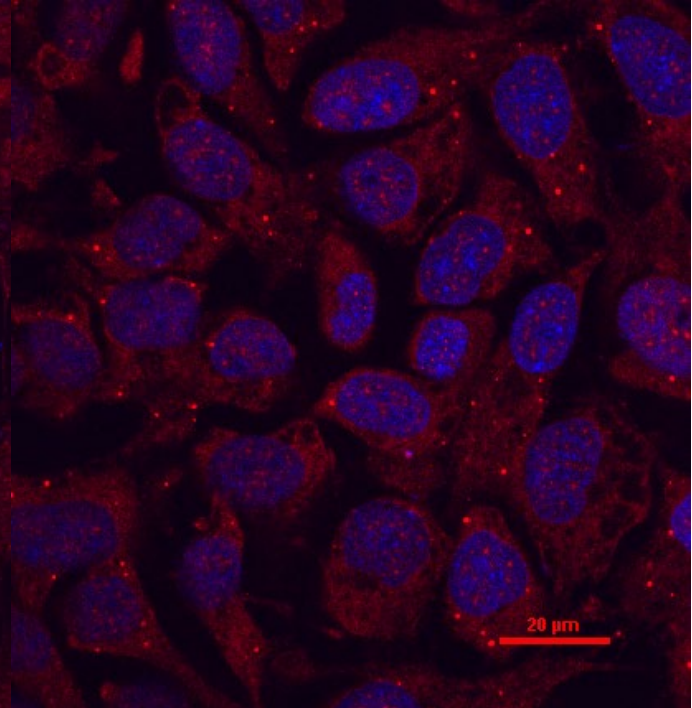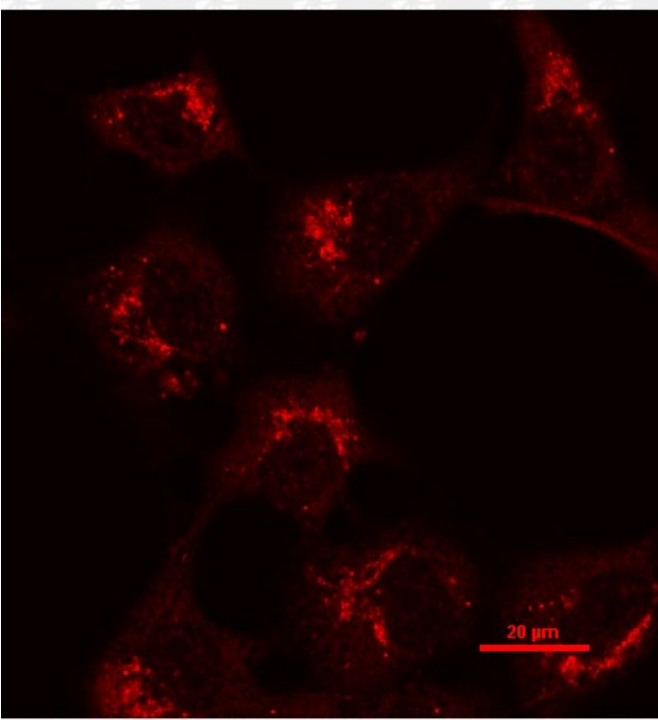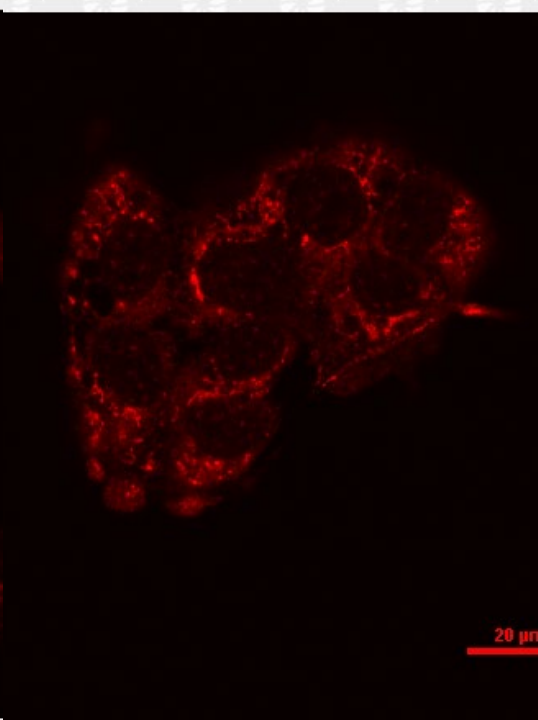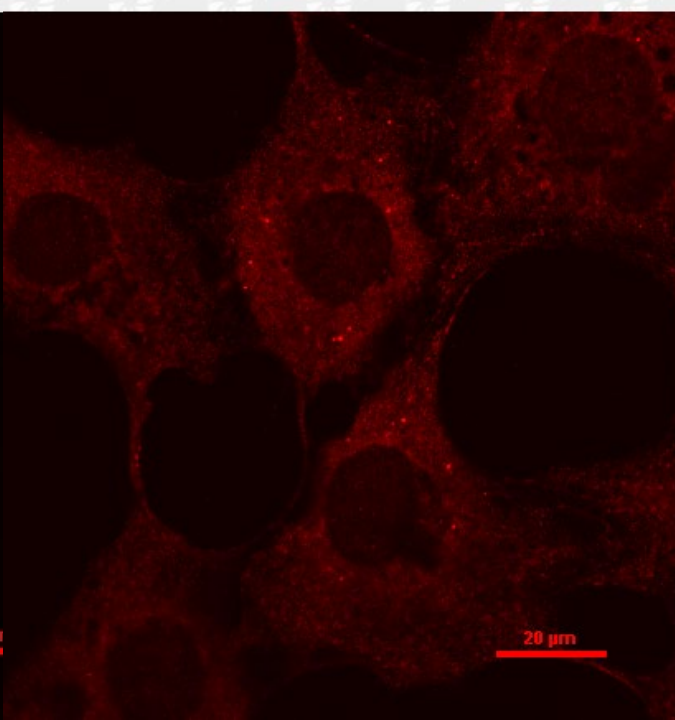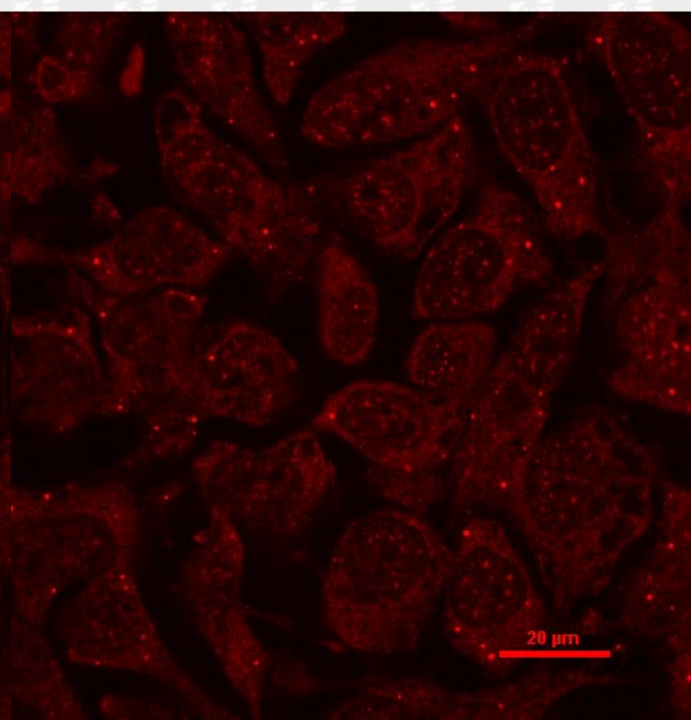

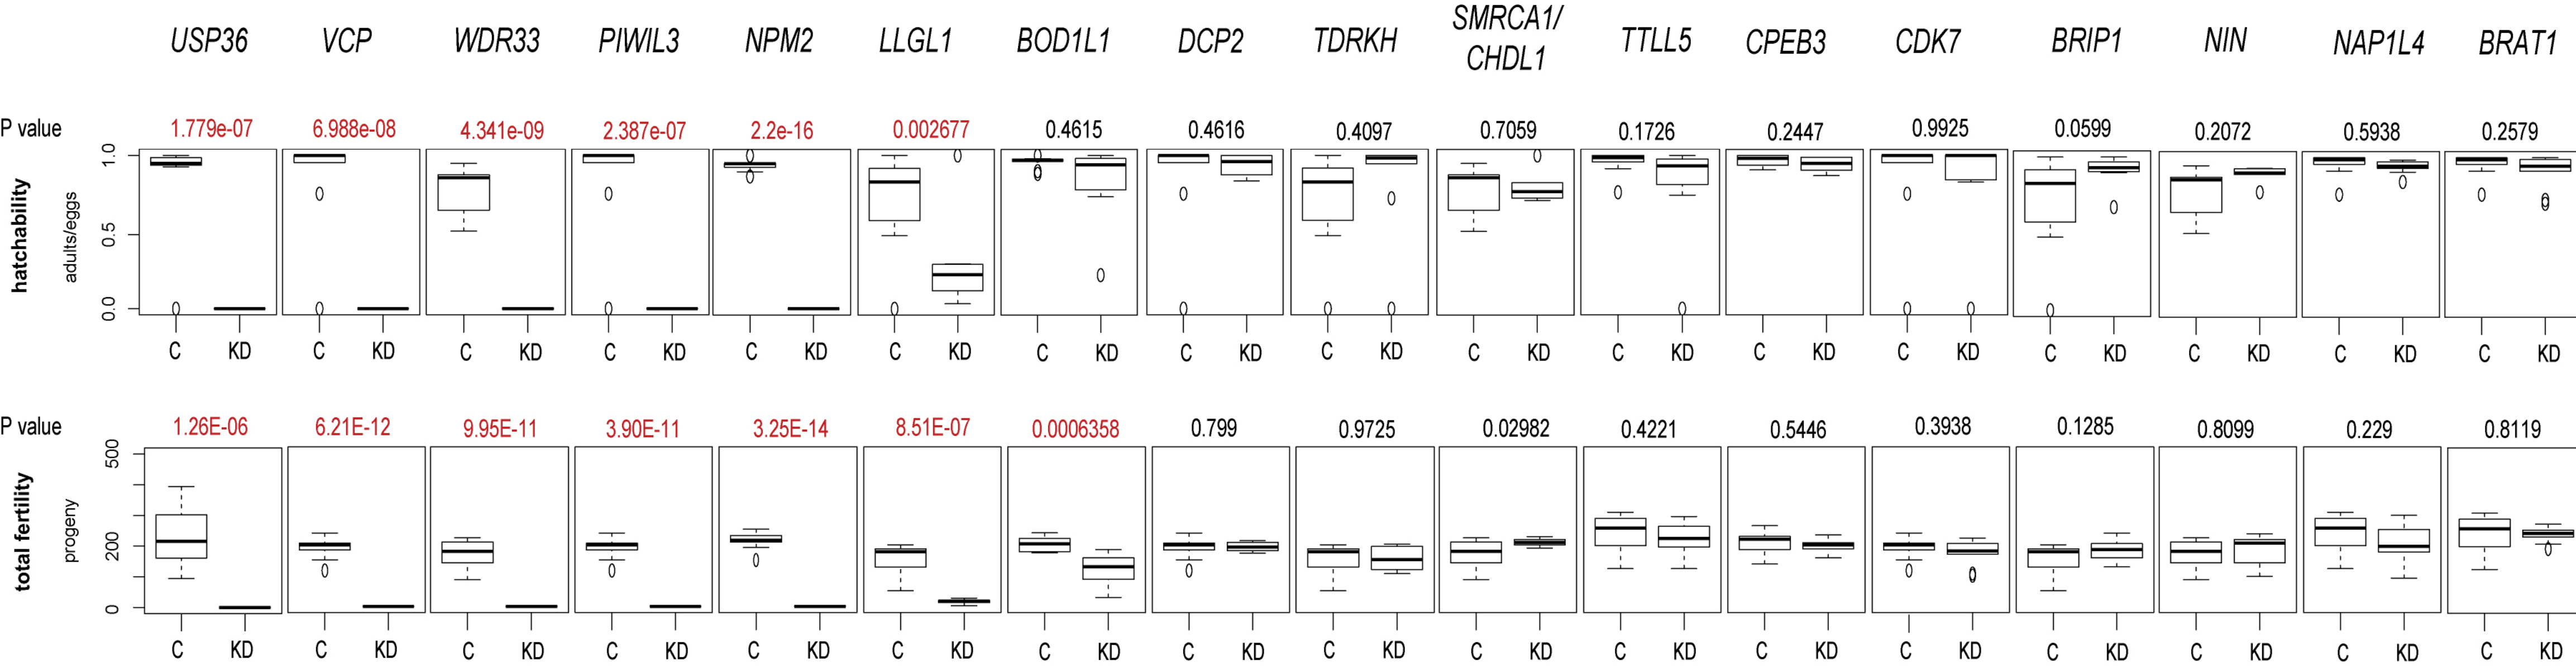

Control

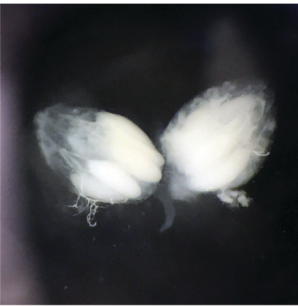

*USP36*

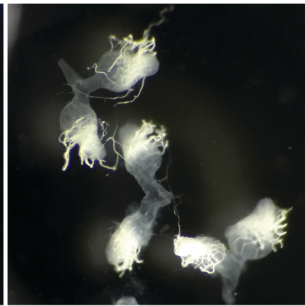

*VCP*

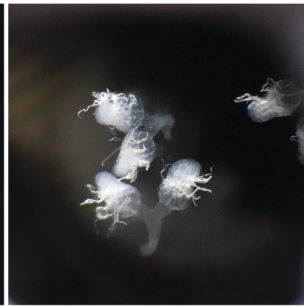

*WDR33*

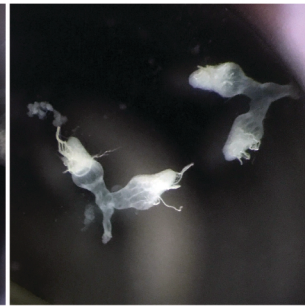

*PIWIL3*

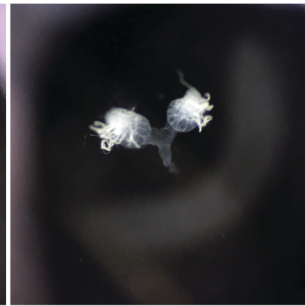

*NPM2*

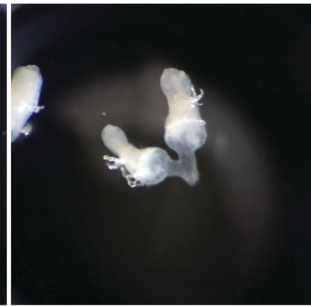

Supplement: Supplementary file [file media-4.pdf]
